# Supplementary material
Source: PubMed Central journal article supplement (PMC6952583)

## **Supporting Information**

|                                                |             |
|------------------------------------------------|-------------|
| <b>Experimental Details.....</b>               | <b>S-2</b>  |
| <b>HPLC Traces .....</b>                       | <b>S-4</b>  |
| <b>MS and HPLC Data.....</b>                   | <b>S-17</b> |
| <b>Bioassay Initial Screening Results.....</b> | <b>S-19</b> |
| <b>Dose Response Curves.....</b>               | <b>S-32</b> |

\* To whom correspondence should be addressed. [ytalgan@unr.edu](mailto:ytalgan@unr.edu)

## Experimental details

### Solid Phase Peptide Synthesis

The resin (0.1 g) was first swelled by suspension in DCM for 30 minutes at room temperature and then drained. The resin was then washed with DMF (3 × 2 mL). Fmoc removal was accomplished with treatment of the resin by 2 mL of 20% piperidine in DMF and shaking at 200 rpm for 7.5 minutes. This process was then repeated once more for a total of 15 minutes deprotection time and then washed with DMF (3 × 2 mL). To couple each amino acid, Fmoc protected amino acids (2 equiv. relative to the resin loading) was dissolved in 2 mL DMF and mixed with 2-(1H-benzotriazol-1-yl)-1,1,3,3-tetramethyluronium hexafluorophosphate (HBTU; 2 equiv.) and diisopropylethylamine (DIPEA; 2 equiv.). The solution was allowed to pre-activate for 1 minute prior to being added to the resin and shaken at 200 rpm for 1 hour at room temperature. After each coupling step, the resin was drained and washed with DMF (2 × 2 mL).

### Final cleavage

The resin containing the final peptide product was washed with 5 mL diethyl ether and air dried for 10 minutes before transferring it into a 15 mL falcon tube. 3 mL of 2.5% water and 2.5% TIPS in TFA was then added and the tube was shaken for 3 hours. The cleaved peptide was filtered through a cotton ball into a 50 mL falcon tube. A cooled solution of diethyl ether:hexane (1:1, 45 mL, -20 °C) was added to the filtrate, and the peptide was allowed to precipitate in a freezer at -20 °C for 10 minutes. The 50 mL tube was centrifuged in a Beckman Coulter Allegra 6 centrifuge equipped with a GH3.8 rotor at 3000 rpm for 5 minutes to pellet the crude peptide. The supernatant was decanted off and the remaining crude peptide was dissolved in 10 mL ACN:H<sub>2</sub>O (1:1) and lyophilized.

## Biological Assays

### Beta-Galactosidase Assays

An initial activation screening was performed at a high concentration (10 μM) for all CSP2 analogs. 198 μL bacterial culture were placed in triplicate to a 96-well plate containing 2 μL of CSP2 peptides and incubated at 37 °C for 30 minutes. A total of 2 μL of 20 μM solution of CSP1 (200 nM final concentration) were added in triplicate and served as the positive control for the group I strain (D39pcomX::lacZ), while 2 μL of 100 μM solution of CSP2 (1000 nM final concentration) were added as the positive control for the group II strain (TIGR4pcomX::lacZ). These concentrations were chosen to afford full activation of the QS circuit, as determined from the dose-dependent curves created for the native CSPs. 2 μL dimethyl sulfoxide (DMSO) were added in triplicate and served as the negative control. After the incubation time had elapsed, the absorbance at 600<sub>nm</sub> was read. The wells were then treated with 20 μL 1% Triton X-100 in water for 30 minutes at 37 °C to lyse the bacterial cells. In a new plate, 100 μL Z-buffer solution (60.2 mM Na<sub>2</sub>HPO<sub>4</sub>, 45.8 mM NaH<sub>2</sub>PO<sub>4</sub>, 10 mM KCl, and 1.0 mM MgSO<sub>4</sub> in 18 MΩ H<sub>2</sub>O; pH was adjusted to 7.0 and the buffer was sterilized before use) containing 2-Nitrophenyl-Beta-D-galactopyranoside (ONPG) at a final concentration of 0.4 mg/mL were added, followed by 100 μL lysate, and the plate was incubated for 3 hours at 37 °C. After the incubation, the reaction was quenched by adding 50 μL of 1 M sodium carbonate solution, and the OD 420<sub>nm</sub> and OD 550<sub>nm</sub> were measured using a plate reader, allowing for the calculation of the activity in Miller units (see below). The final results were reported as percent activation, which is the ratio between the Miller units of the analog and that of the positive control.

$$\text{Miller Unit} = 1000 \times \frac{[Abs_{420} - (1.75 \times Abs_{550})]}{(t \times v \times Abs_{600})}$$

Abs<sub>420</sub> is the absorbance of o-nitrophenol (ONP). Abs<sub>550</sub> is the scatter from cell debris, which, when multiplied by 1.75 approximates the scatter observed at 420 nm.  $t$  is the duration of incubation with ONPG in minutes,  $v$  is volume of lysate in milliliters, and Abs<sub>600</sub> reflects cell density.

### **EC<sub>50</sub> Experiments**

Analogs that exhibited high activity in the initial screening were further evaluated using a dose-dependent assay in which peptide stock solutions were diluted with DMSO in serial dilution and assayed as described above. The EC<sub>50</sub> value was then determined through fitting using nonlinear regression with GraphPad Prism 5.

### **IC<sub>50</sub> Experiments**

Analogs that exhibited low *comX* activation in the initial screening were evaluated for competitive inhibition. The ability of synthesized CSP2 analogs to inhibit the expression of *comX* by outcompeting CSP for the receptor binding site was evaluated using the same assay conditions as described above, except that in the initial inhibition screening, the native CSP was added to every well in a set concentration (50 nM CSP1 for group I; 250 nM CSP2 for group II) that was chosen to afford full activation of the QS circuit, as determined from the dose-dependent curves created for the native CSPs. 2  $\mu$ L of native CSP (5  $\mu$ M solution of CSP1 for group I; 25  $\mu$ M solution of CSP2 for group II) and 2  $\mu$ L of 1 mM solution of CSP analogs were added to the same well in triplicate in a clear 96-well microtiter plate. 2  $\mu$ L native CSP (5  $\mu$ M solution of CSP1 for group I; 25  $\mu$ M solution of CSP2 for group II) and 2  $\mu$ L DMSO were added to the same well in triplicate and served as the positive control. 4  $\mu$ L DMSO were added in triplicate and served as the negative control. Then, 196  $\mu$ L bacterial culture were added to the wells and the plate was incubated at 37 °C for 30 minutes. The procedure for lysis, incubation with ONPG and all the measurements were as described in the beta-galactosidase assay section above. Analogs that exhibited significant competitive inhibition in the initial screening were further evaluated using a dose-dependent assay where peptide stock solutions were diluted with DMSO in serial dilutions and assayed as described above. GraphPad Prism 5 was used to calculate the IC<sub>50</sub> values, which are the concentration of an inhibitor where the response (or binding) is reduced by half.

# HPLC Traces

## CSP2(15)-I4LI7F

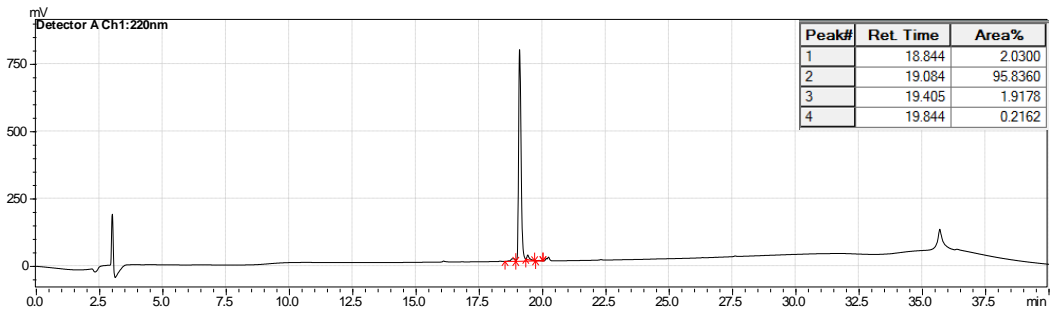

## CSP2(15)-I4LL9R

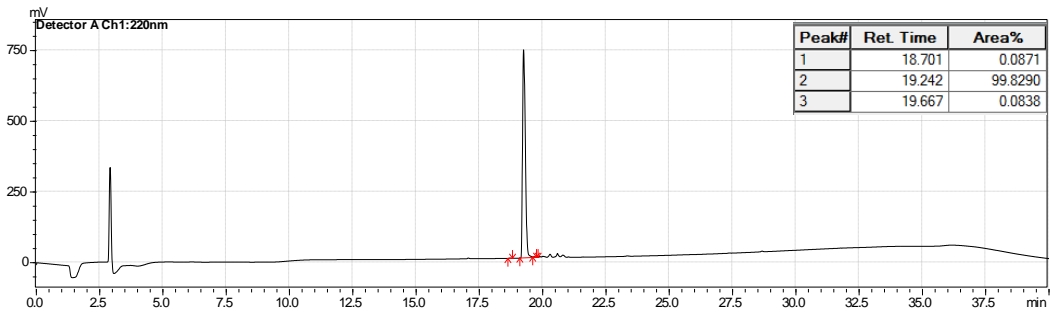

## CSP2(15)-I4LL12I

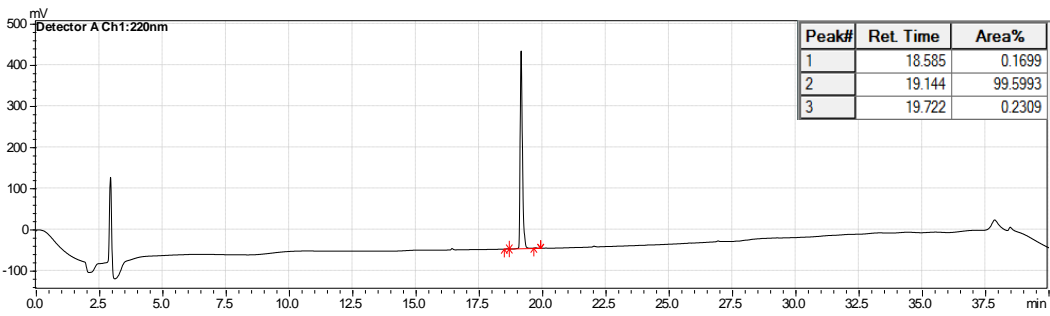

## CSP2(15)-I4LF13L

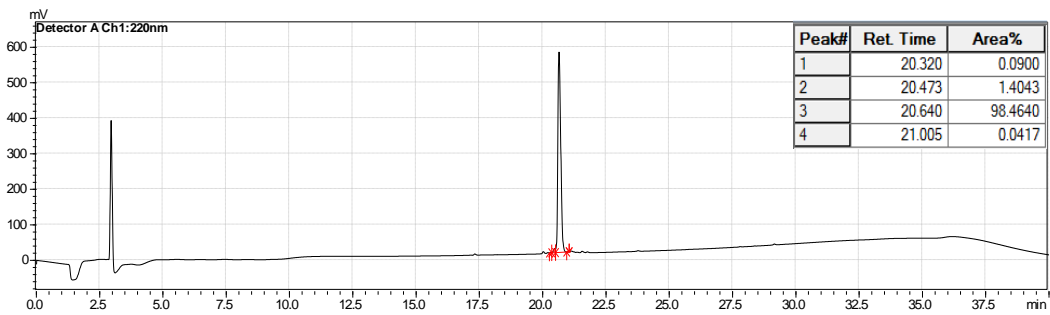

CSP2(15)-I4LL14Q

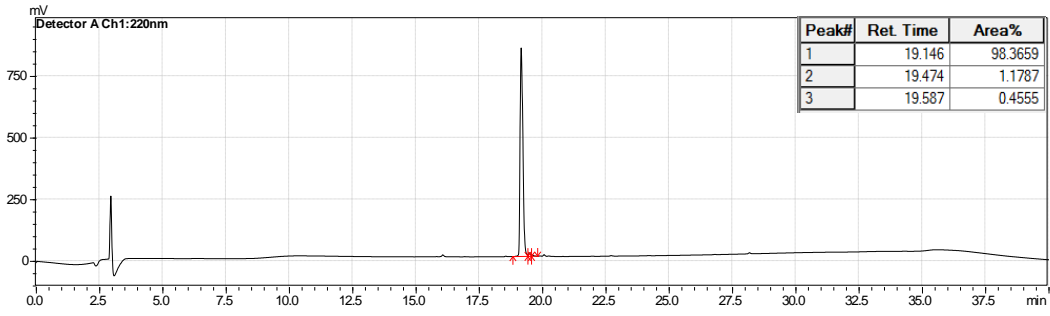

CSP2(15)-I7FL9R

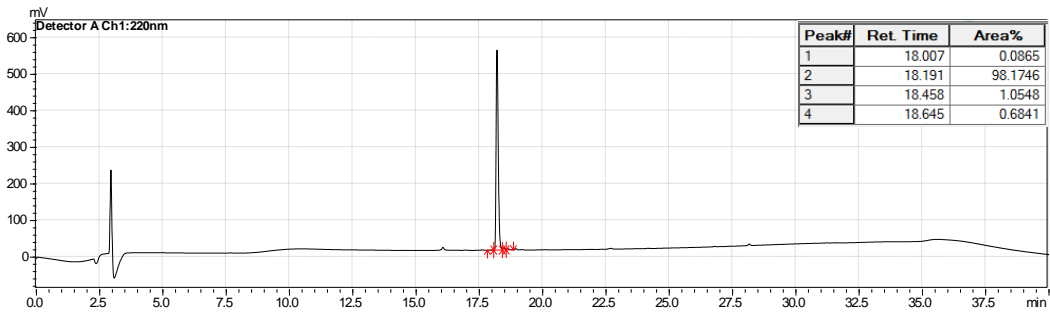

CSP2(15)-I7FL12I

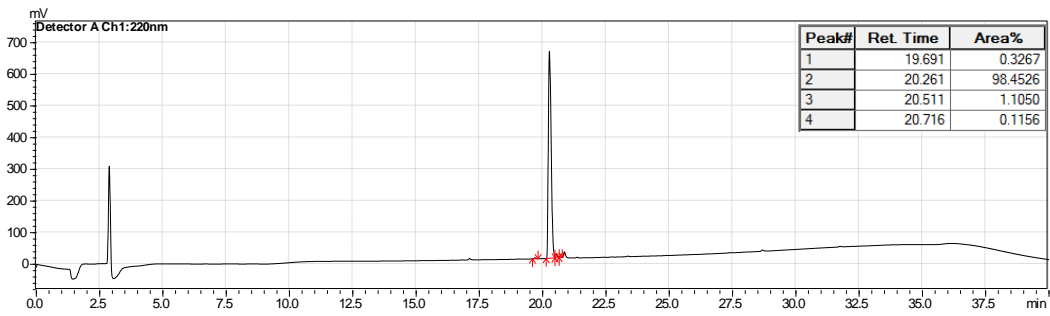

CSP2(15)-I7FF13L

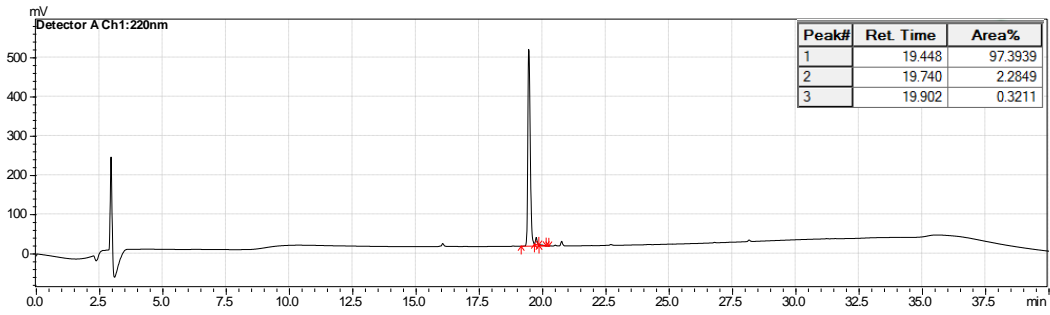

CSP2(15)-I7FL14Q

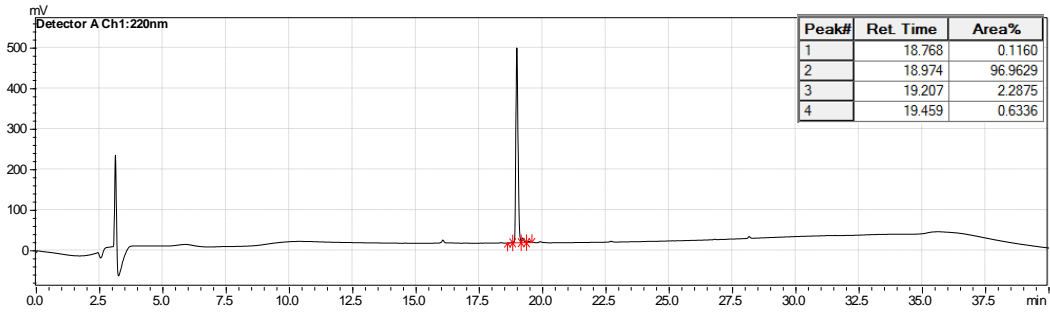

CSP2(15)-L9RL12I

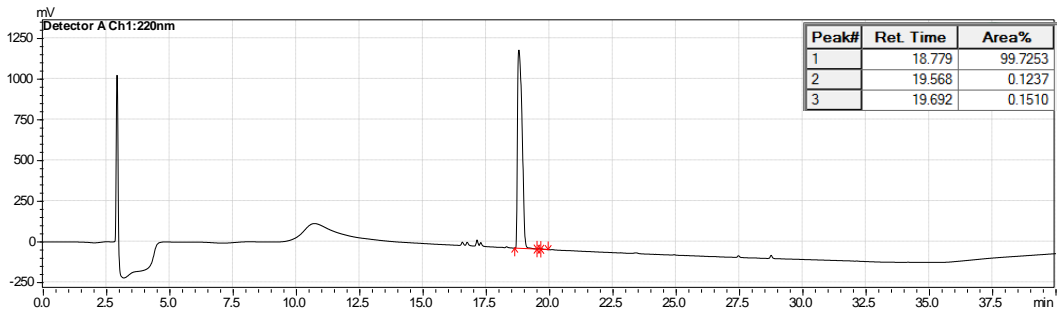

CSP2(15)-L9RF13L

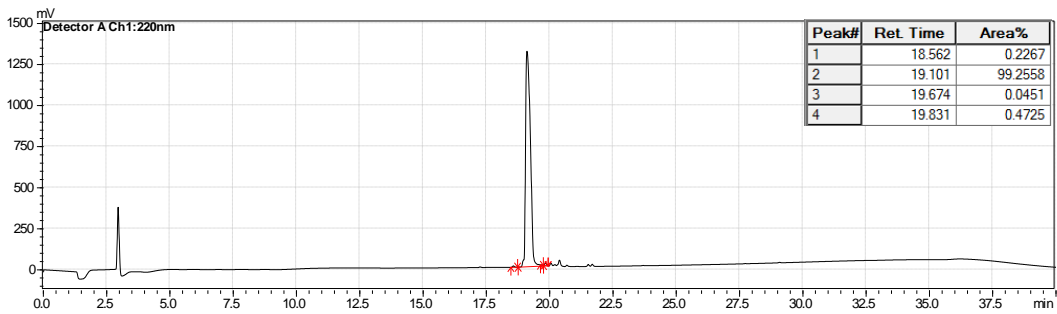

CSP2(15)L9RL14Q

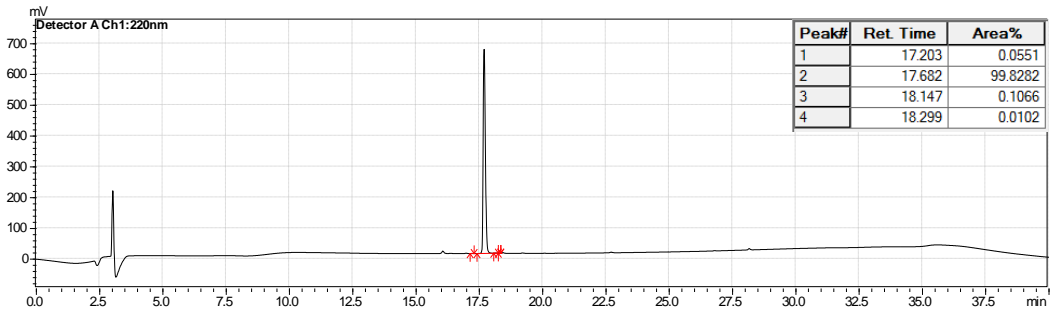

CSP2(15)-L12IF13L

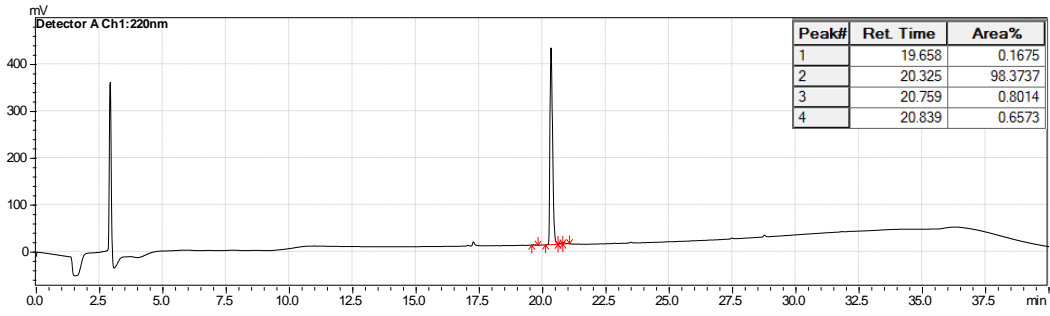

CSP2(15)-L12IL14Q

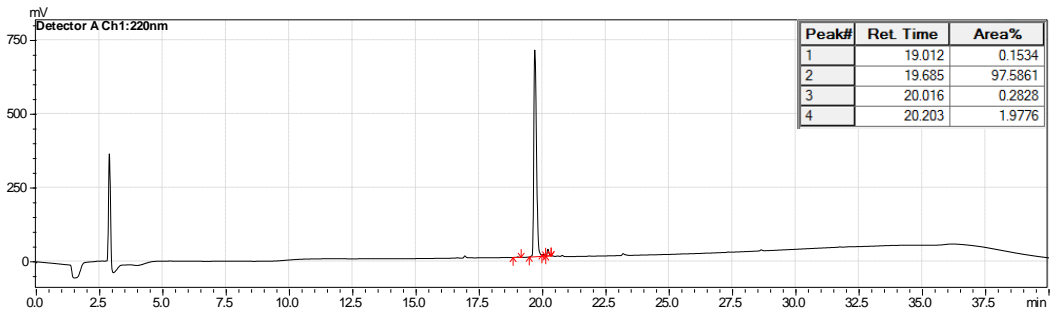

CSP2(15)-F13LL14Q

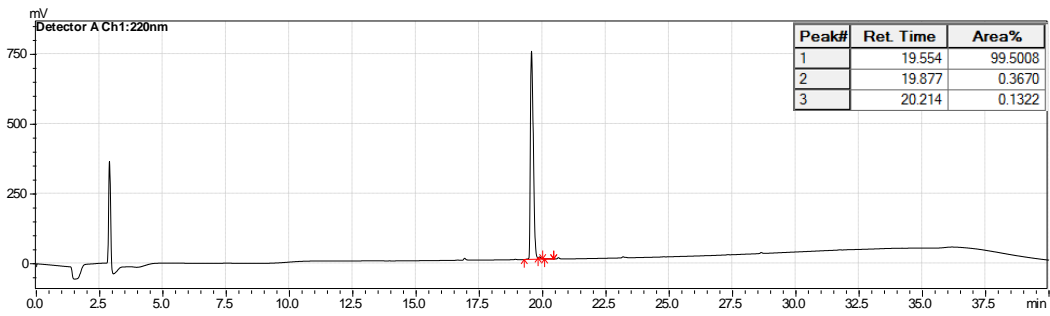

CSP2(15)-I4LL9RF13L

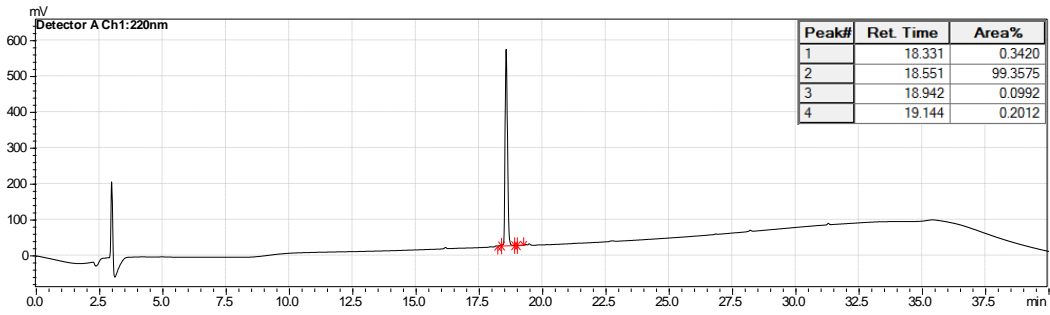

CSP2(15)-I4LL9RL14Q

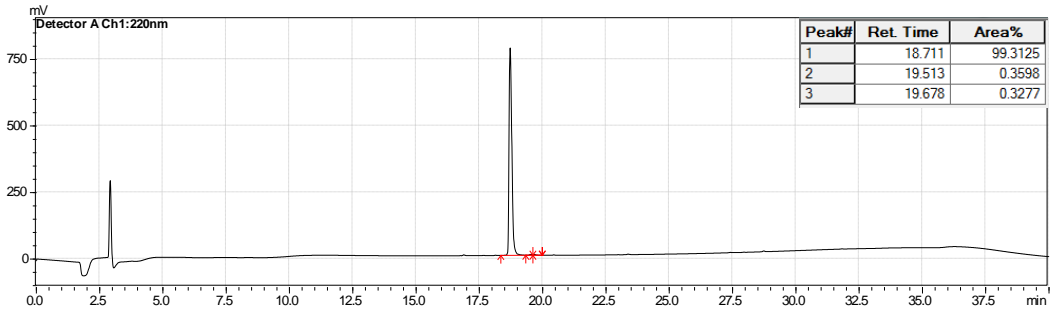

CSP2(15)-I4LF13LL14Q

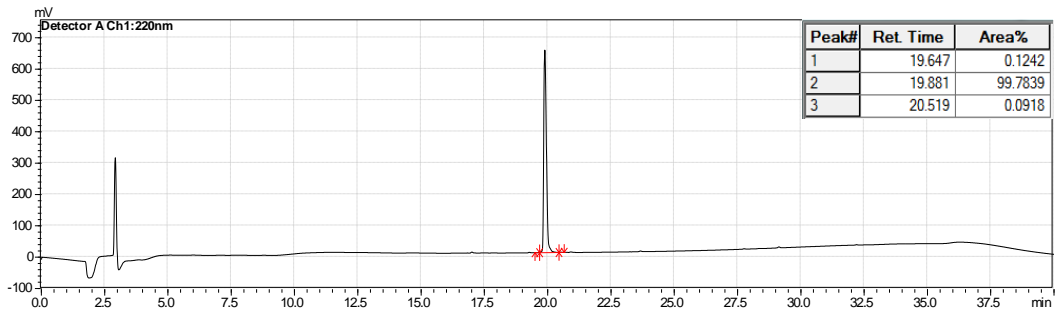

CSP2(15)-L9RF13LL14Q

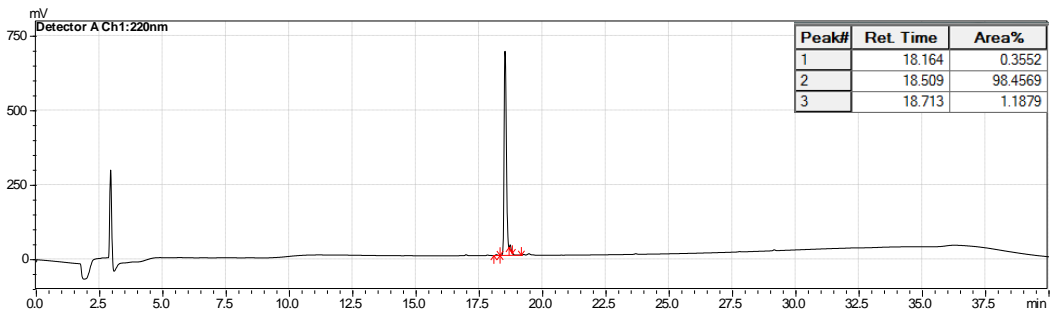

CSP2(15)-I4LL9RF13LL14Q

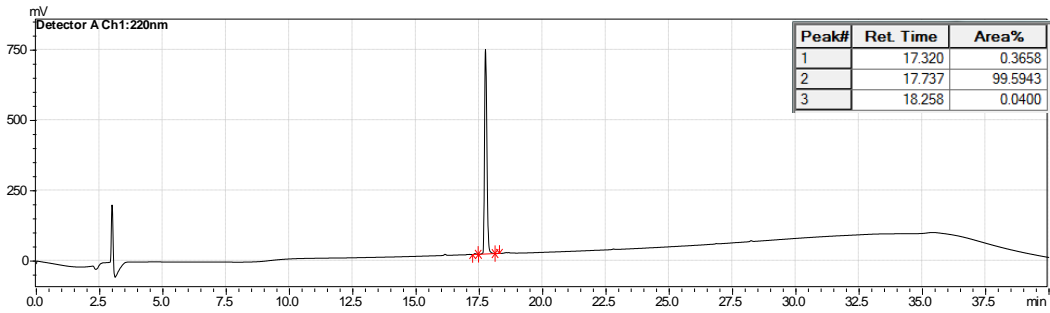



CSP2(15)-I4LR6KL9RF13LL14Q

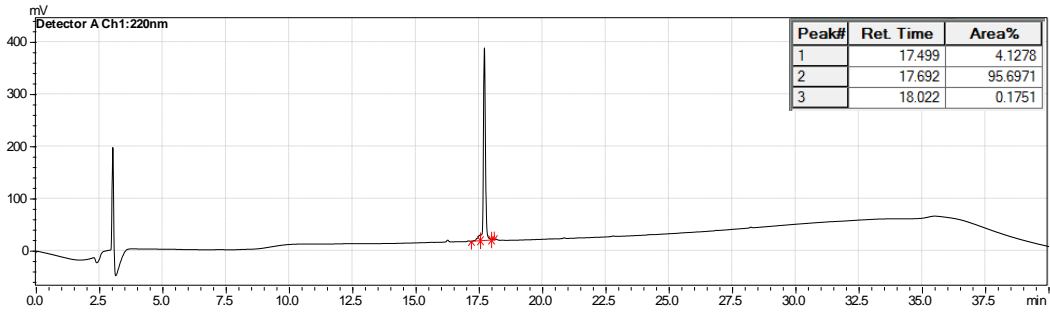

CSP2(15)-I4LI7FL9RF13LL14Q

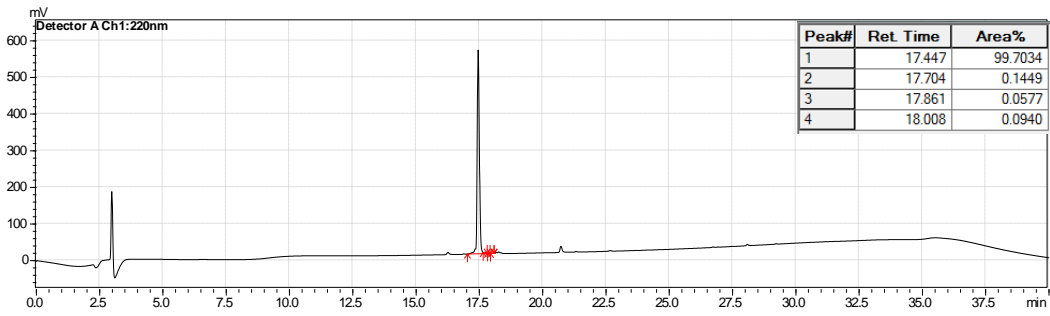

CSP2(15)-I4LI8FL9RF13LL14Q

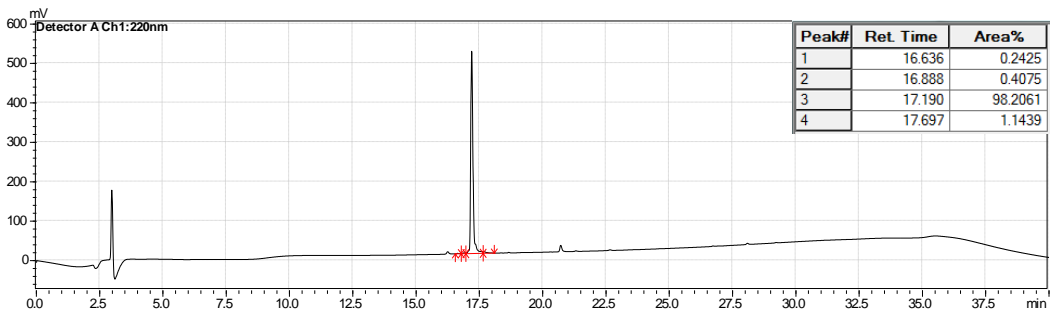

CSP2(15)-I4LL9RL12IF13LL14Q

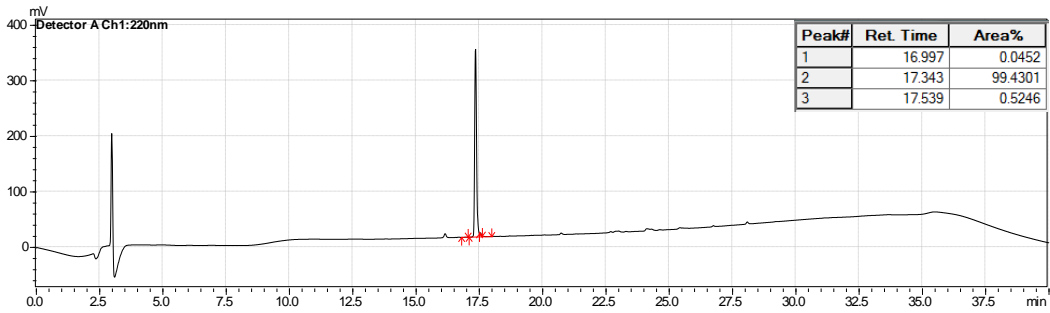

CSP2-E1AL9RL14Q

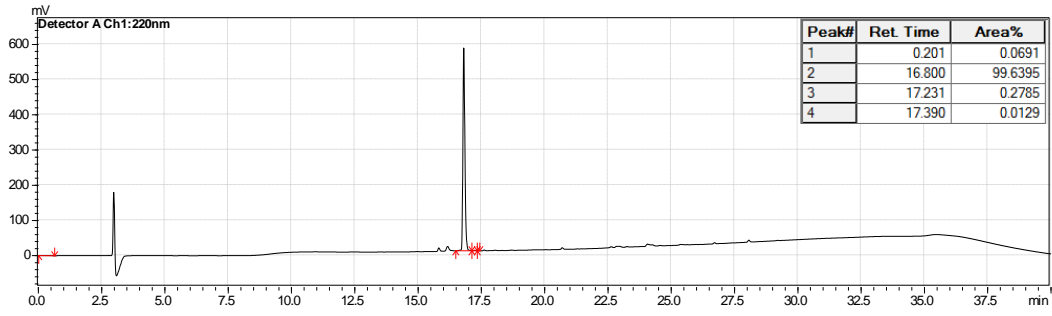

CSP2-E1AL9Rd10L14Q

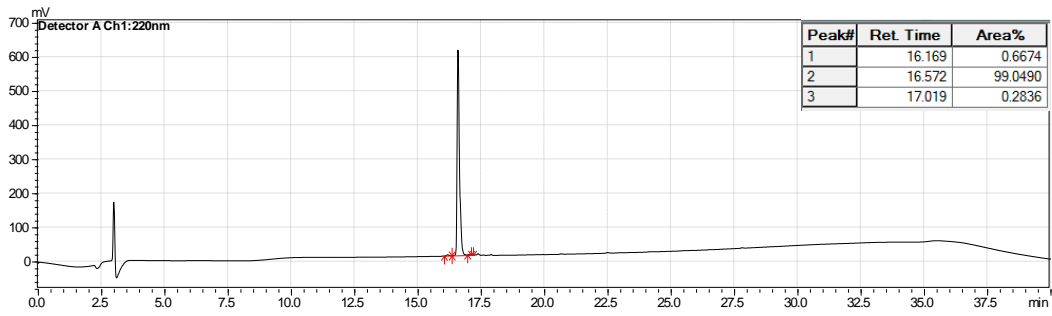

CSP2-E1AI4LL9RL14Q

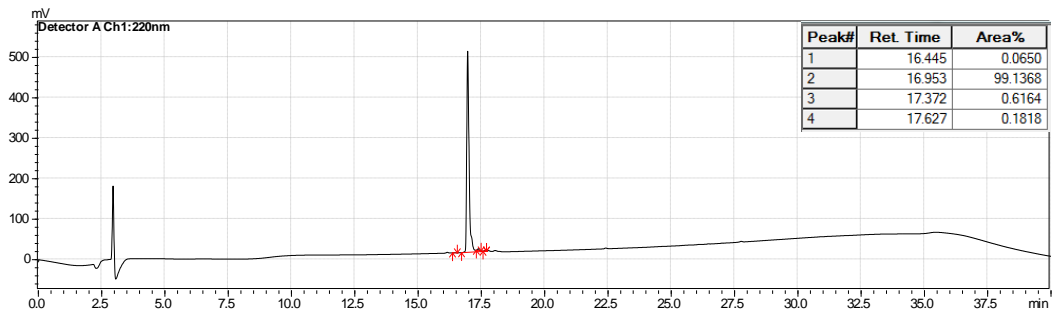

CSP2-E1AI4LL9Rd10L14Q

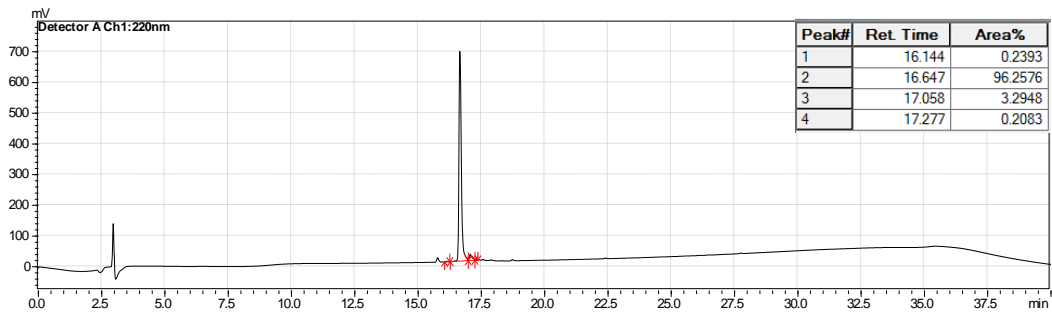

CSP2-E1AI4LL9RF13LL14Q

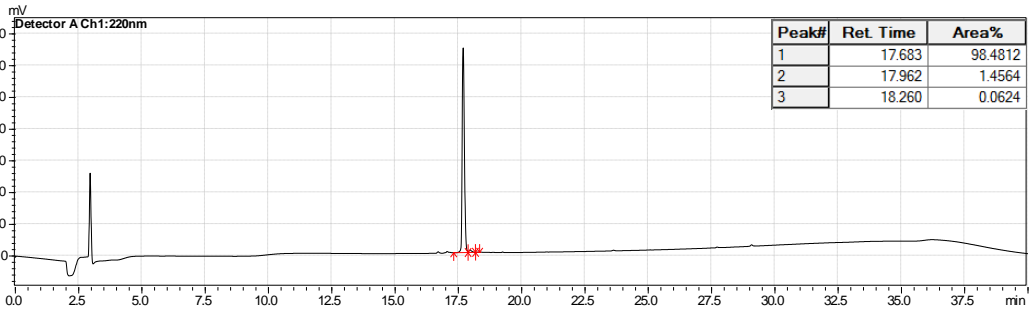

CSP2-E1AI4LL9Rd10F13LL14Q

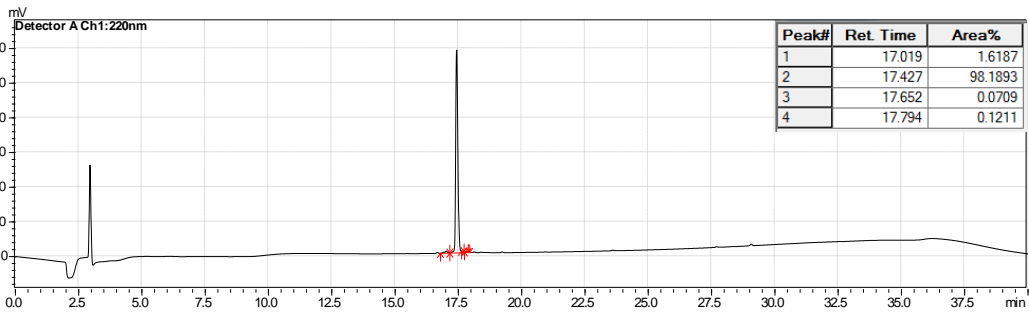

CSP2-E1AI4LI8FL9RF13LL14Q

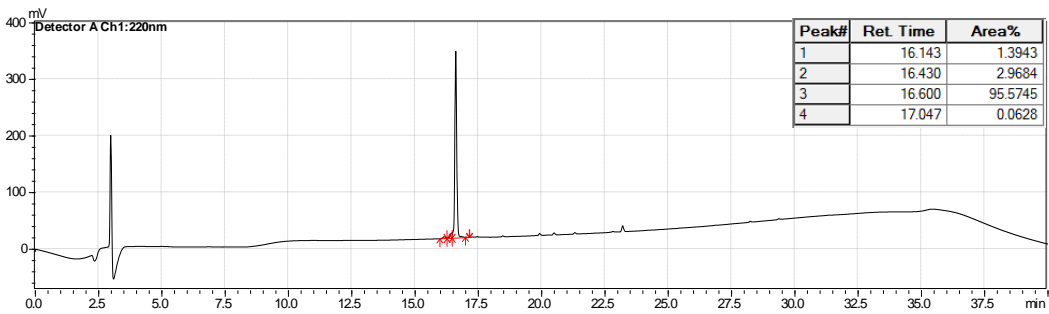

CSP2-E1AI4LI8FL9Rd10F13LL14Q

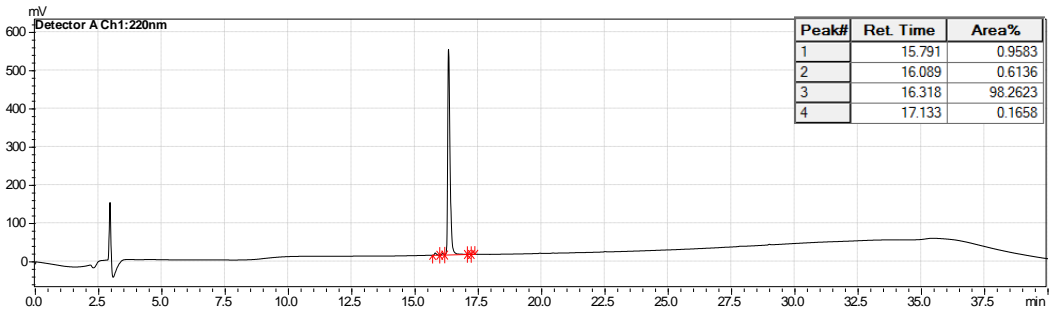

CSP2-E1AI4Nvad10

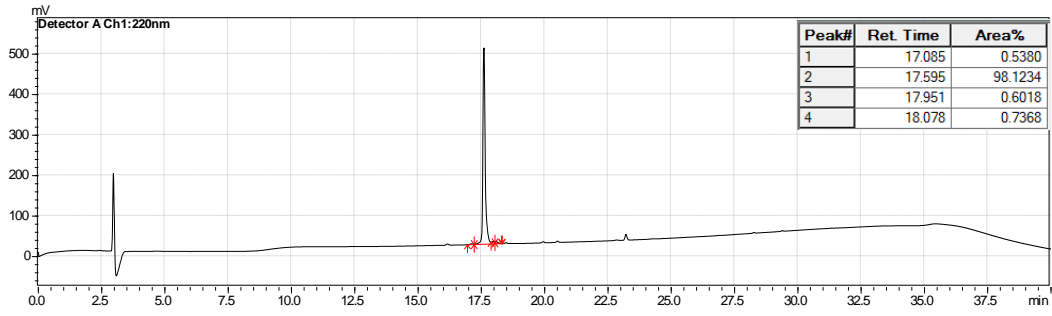

CSP2-E1AI4Nled10

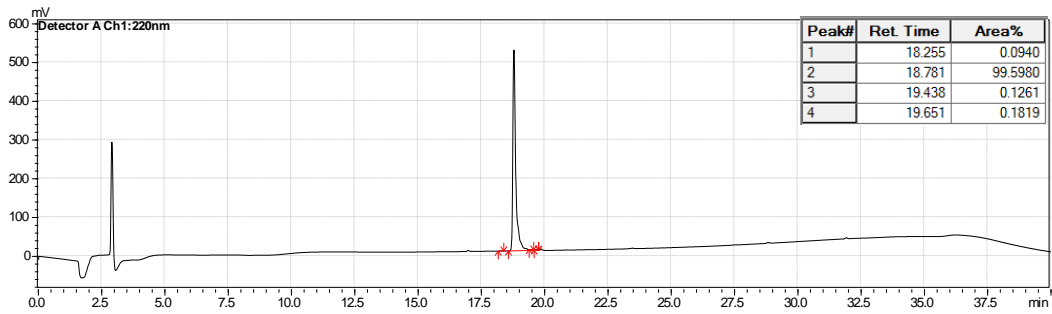

CSP2-E1AI4HLeud10

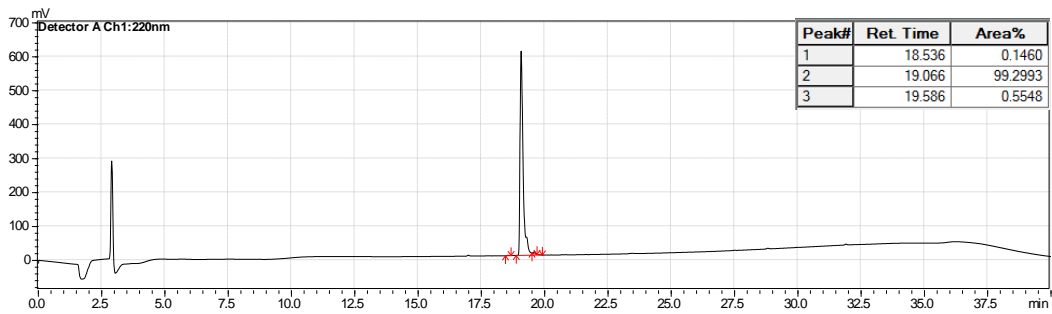

CSP2-E1AI4Nval8FL9RF13LL14Q

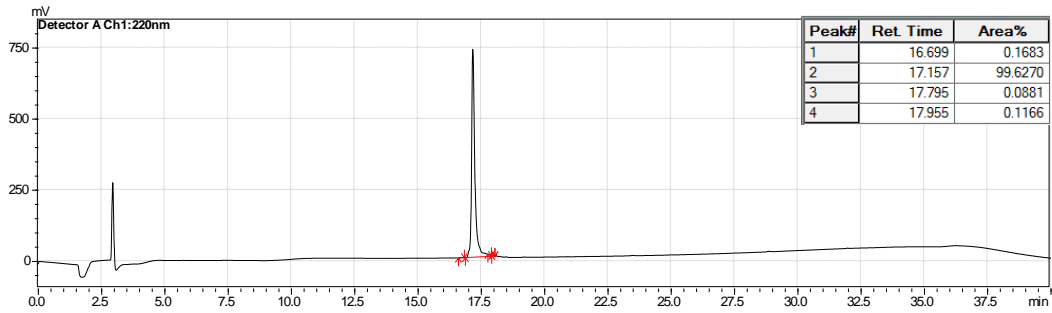

CSP2-E1AI4Nval8FL9Rd10F13LL14Q

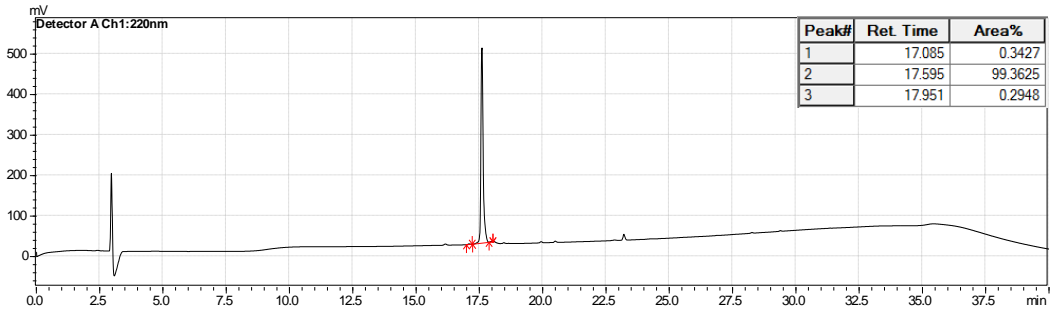

CSP2-E1AI4Nval8Fd10

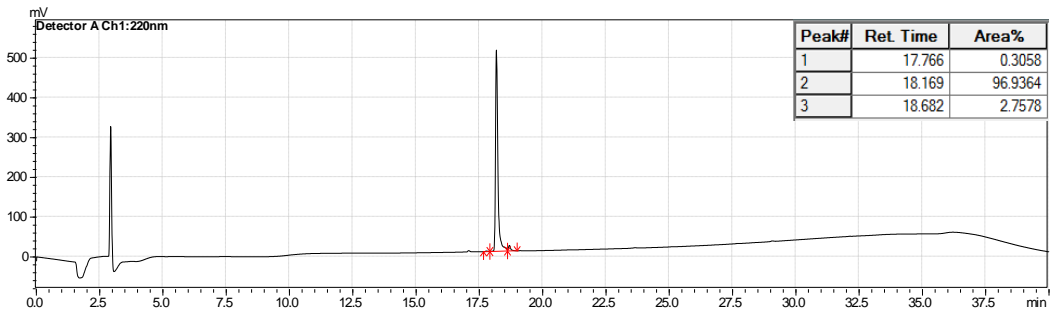

CSP2-E1AI4Nval9Rd10

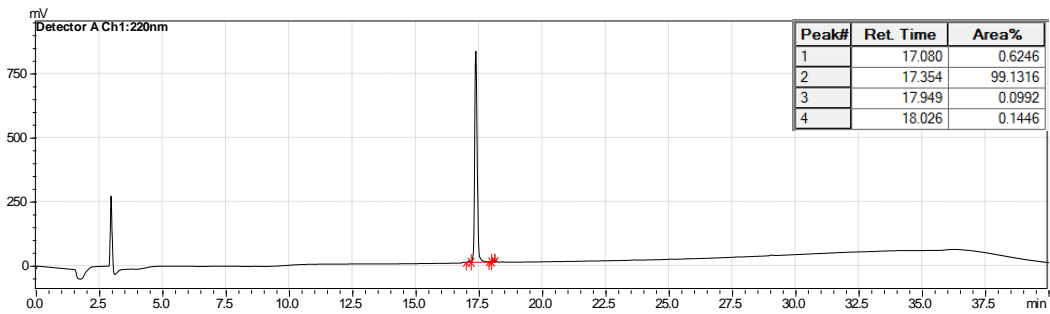

CSP2-E1AI4Nvad10F13L

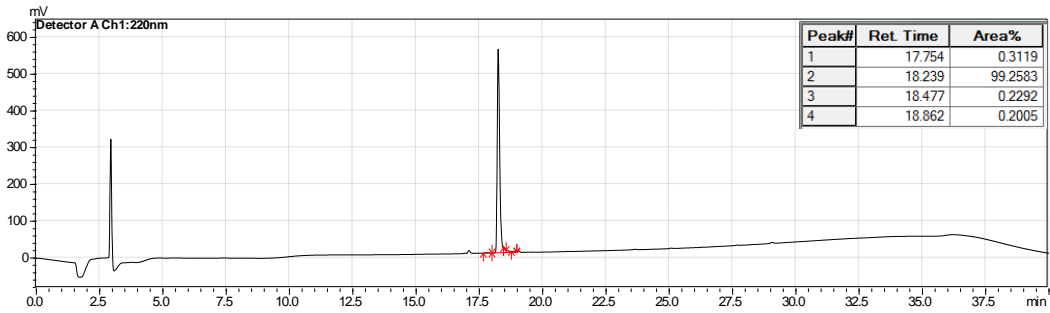

CSP2-E1AI4Nvad10L14Q

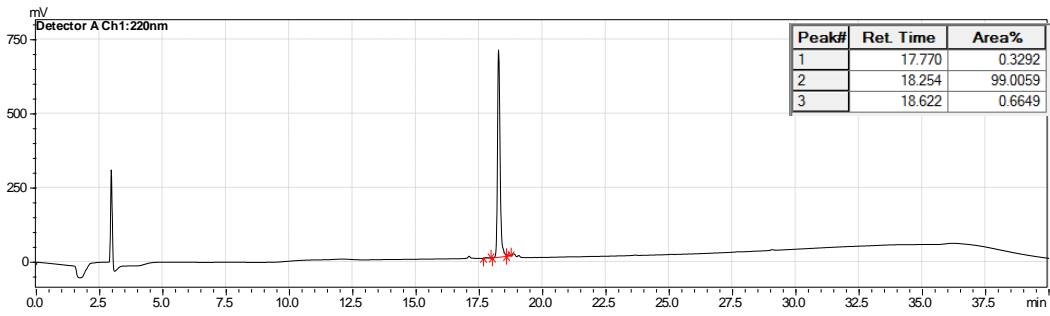

CSP2-E1AI4Nval8FL9Rd10

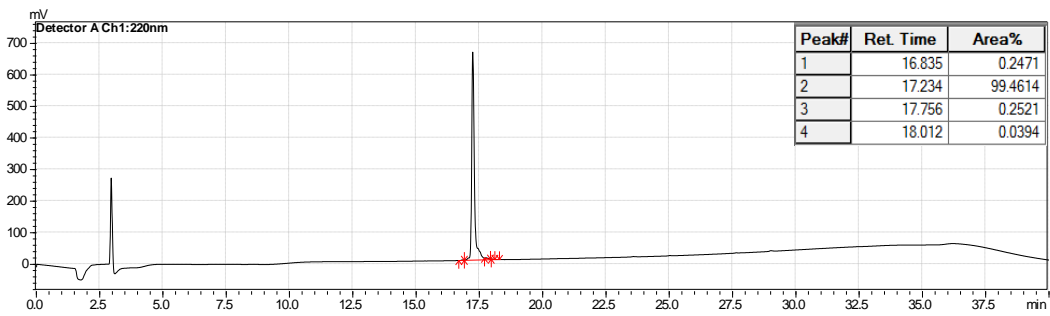

CSP2-E1AI4Nval8Fd10F13L

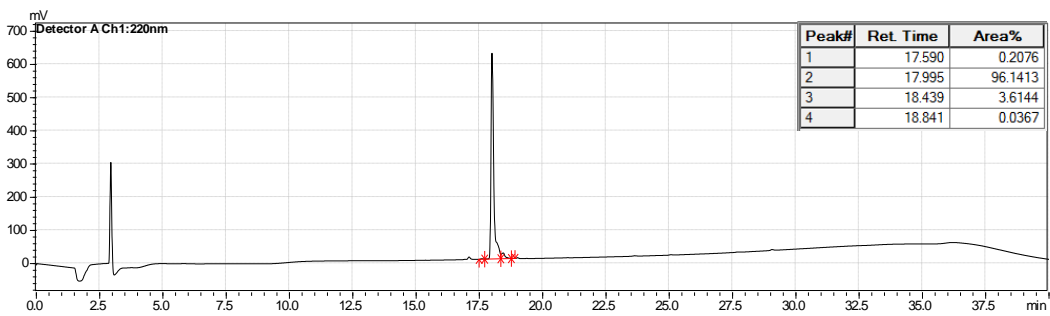

CSP2-E1AI4Nval8Fd10L14Q

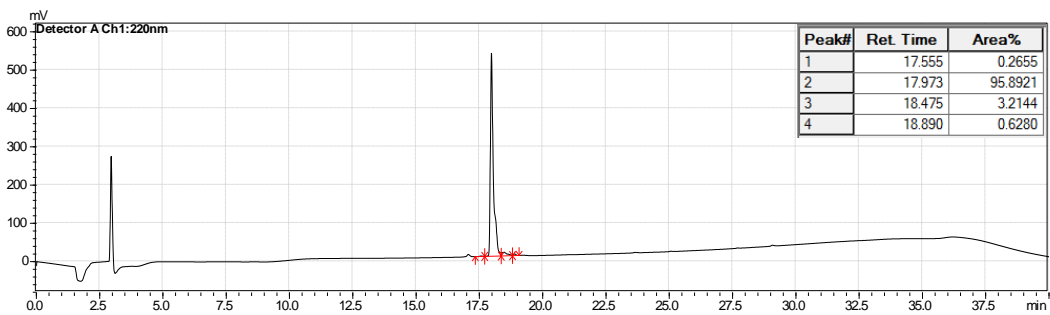

CSP2-E1AI4NvaL9Rd10F13L

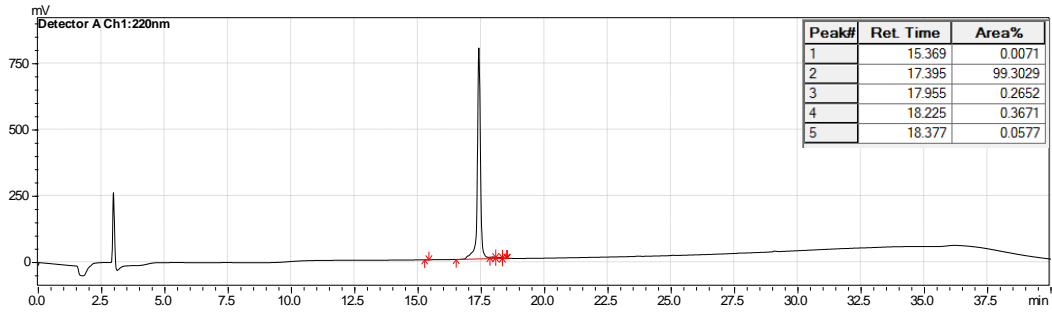

CSP2-E1AI4NvaL9Rd10L14Q

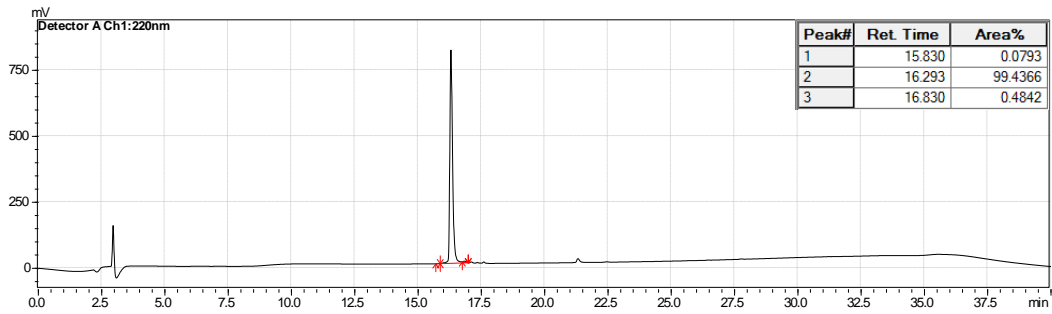

CSP2-E1AI4Nvad10F13LL14Q

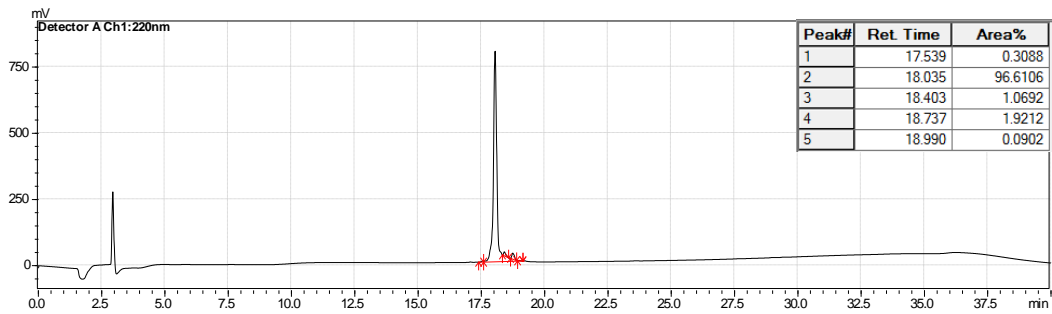

CSP2-E1AI4NvaI8FL9Rd10L14Q

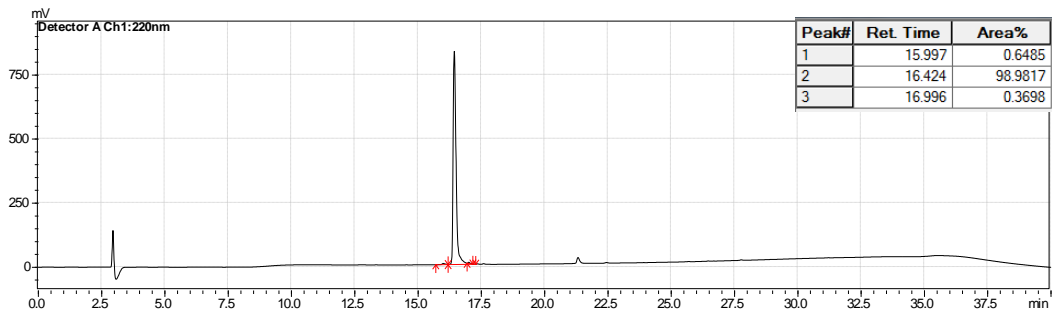

CSP2-E1AI4Nval8FL9Rd10F13L

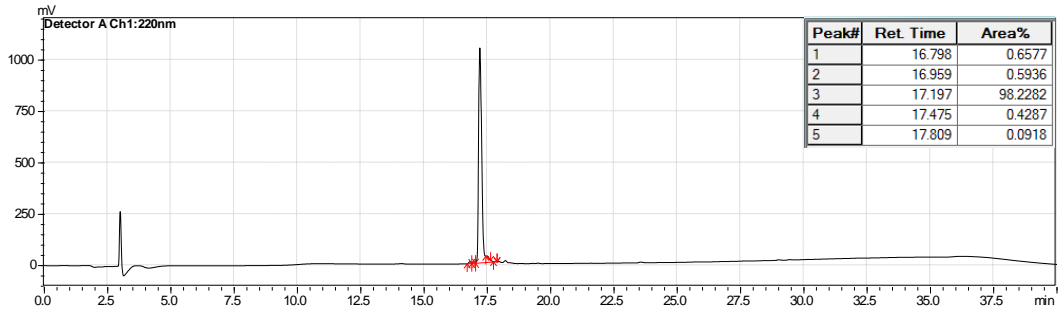

CSP2-E1Ad10L14Q

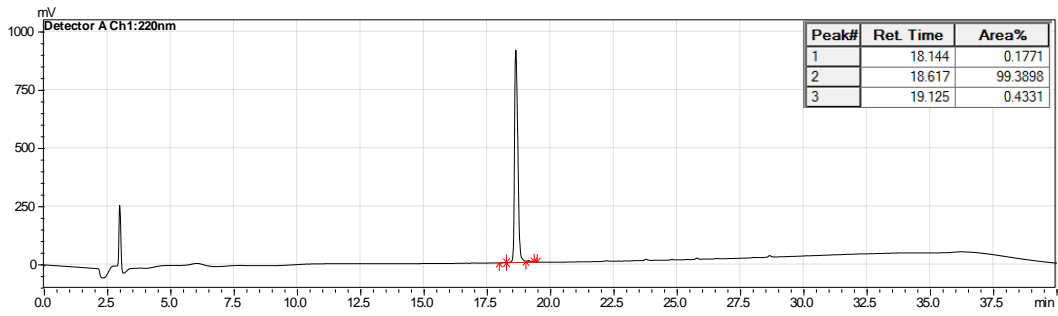

CSP2-E1AI4Ld10L14Q

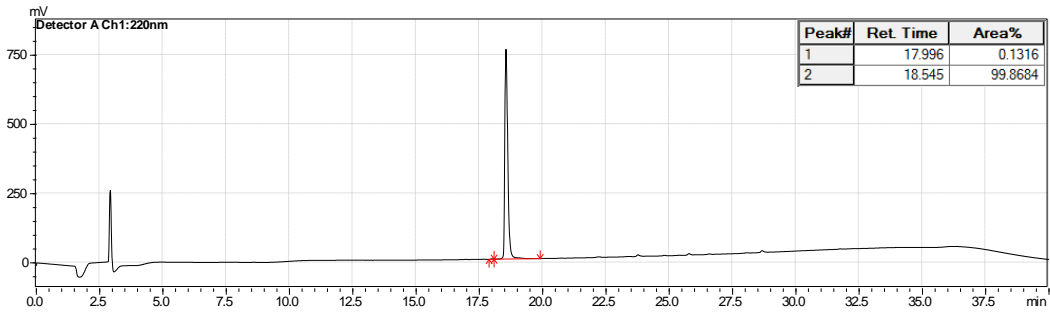



## MS and HPLC data for CSP2 analogs

*Table S-1.* MS and HPLC data for CSP2(15) analogs.

| Compound Name               | Calc. EM<br>MH <sub>2</sub> <sup>2+</sup> | Obs. EM<br>MH <sub>2</sub> <sup>2+</sup> | Purity<br>(%) |
|-----------------------------|-------------------------------------------|------------------------------------------|---------------|
| CSP2(15)-I4LI7F             | 979.0495                                  | 979.0511                                 | >96           |
| CSP2(15)-I4LL9R             | 983.5658                                  | 983.5678                                 | >99           |
| CSP2(15)-I4LL12I            | 962.0573                                  | 962.0558                                 | >99           |
| CSP2(15)-I4LF13L            | 945.0651                                  | 945.0669                                 | >98           |
| CSP2(15)-I4LL14Q            | 969.5445                                  | 969.5459                                 | >98           |
| CSP2(15)-I7FL9R             | 1000.5580                                 | 1000.5534                                | >98           |
| CSP2(15)-I7FL12I            | 979.0495                                  | 979.0463                                 | >98           |
| CSP2(15)-I7FF13L            | 962.0573                                  | 962.0576                                 | >97           |
| CSP2(15)-I7FL14Q            | 986.5367                                  | 986.5376                                 | >96           |
| CSP2(15)-L9RL12I            | 983.5658                                  | 983.5390                                 | >99           |
| CSP2(15)-L9RF13L            | 966.5736                                  | 966.5752                                 | >99           |
| CSP2(15)-L9RL14Q            | 991.0530                                  | 991.0545                                 | >99           |
| CSP2(15)-L12IF13L           | 948.0886                                  | 948.0899                                 | >98           |
| CSP2(15)-L12IL14Q           | 969.5445                                  | 969.5478                                 | >97           |
| CSP2(15)-F13LL14Q           | 952.5524                                  | 952.5543                                 | >99           |
| CSP2(15)-I4LL9RF13L         | 966.0722                                  | 966.0735                                 | >99           |
| CSP2(15)-I4LL9RL14Q         | 991.0530                                  | 991.0525                                 | >99           |
| CSP2(15)-I4LF13LL14Q        | 952.5524                                  | 952.5542                                 | >99           |
| CSP2(15)-L9RF13LL14Q        | 974.0608                                  | 974.0622                                 | >98           |
| CSP2(15)-I4LL9RF13LL14Q     | 990.0469                                  | 990.0482                                 | >99           |
| CSP2(15)-I4LR6KL9RF13LL14Q  | 960.0578                                  | 960.0545                                 | >95           |
| CSP2(15)-I4LI7FL9RF13LL14Q  | 991.0530                                  | 991.0563                                 | >99           |
| CSP2(15)-I4LI8FL9RF13LL14Q  | 991.0530                                  | 991.0568                                 | >98           |
| CSP2(15)-I4LL9RL12IF13LL14Q | 974.0608                                  | 974.0612                                 | >99           |

**Table S-2.** MS and HPLC data for CSP2 analogs.

| <b>Compound Name</b>           | <b>Calc. EM<br/>MH<sub>2</sub><sup>2+</sup></b> | <b>Obs. EM<br/>MH<sub>2</sub><sup>2+</sup></b> | <b>Purity<br/>(%)</b> |
|--------------------------------|-------------------------------------------------|------------------------------------------------|-----------------------|
| CSP2-E1AL9RL14Q                | 1090.1452                                       | 1090.1468                                      | >99                   |
| CSP2-E1AL9Rd10L14Q             | 1090.1452                                       | 1090.1469                                      | >99                   |
| CSP2-E1AI4LL9RL14Q             | 1090.1452                                       | 1090.1475                                      | >99                   |
| CSP2-E1AI4LL9Rd10L14Q          | 1090.1452                                       | 1090.1448                                      | >96                   |
| CSP2-E1AI4LL9RF13LL14Q         | 1073.1531                                       | 1073.1548                                      | >98                   |
| CSP2-E1AI4LL9Rd10F13LL14Q      | 1073.1531                                       | 1073.1536                                      | >98                   |
| CSP2-E1AI4LI8FL9RF13LL14Q      | 1090.1452                                       | 1090.1415                                      | >95                   |
| CSP2-E1AI4LI8FL9Rd10F13LL14Q   | 1090.1452                                       | 1090.1475                                      | >98                   |
| CSP2-E1AI4Nvad10               | 1054.1417                                       | 1054.1411                                      | >98                   |
| CSP2-E1AI4Nled10               | 1061.1495                                       | 1061.1460                                      | >98                   |
| CSP2-E1AI4HLeud10              | 1068.1573                                       | 1068.1591                                      | >99                   |
| CSP2-E1AI4NvaI8FL9RF13LL14Q    | 1083.1374                                       | 1083.1342                                      | >99                   |
| CSP2-E1AI4NvaI8FL9Rd10F13LL14Q | 1083.1374                                       | 1083.1343                                      | >99                   |
| CSP2-E1AI4NvaI8Fd10            | 1071.1339                                       | 1071.1326                                      | >96                   |
| CSP2-E1AI4NvaL9Rd10            | 1075.6502                                       | 1075.6531                                      | >99                   |
| CSP2-E1AI4Nvad10F13L           | 1037.1495                                       | 1037.1521                                      | >99                   |
| CSP2-E1AI4Nvad10L14Q           | 1061.6189                                       | 1061.6192                                      | >99                   |
| CSP2-E1AI4NvaI8FL9Rd10         | 1092.1384                                       | 1092.1370                                      | >99                   |
| CSP2-E1AI4NvaI8Fd10F13L        | 1054.1417                                       | 1054.1432                                      | >96                   |
| CSP2-E1AI4NvaI8Fd10L14Q        | 1078.6211                                       | 1078.6198                                      | >96                   |
| CSP2-E1AI4NvaL9Rd10F13L        | 1058.6580                                       | 1058.6596                                      | >99                   |
| CSP2-E1AI4NvaL9Rd10L14Q        | 1083.1374                                       | 1083.1358                                      | >99                   |
| CSP2-E1AI4Nvad10F13LL14Q       | 1044.6367                                       | 1044.6340                                      | >96                   |
| CSP2-E1AI4NvaI8FL9Rd10L14Q     | 1100.1296                                       | 1100.1308                                      | >98                   |
| CSP2-E1AI4NvaI8FL9Rd10F13L     | 1054.6501                                       | 1054.6525                                      | >99                   |
| CSP2-E1Ad10L14Q                | 1068.6367                                       | 1068.6392                                      | >99                   |
| CSP2-E1AI4Ld10L14Q             | 1068.6367                                       | 1068.6395                                      | >99                   |

## Bioassay Initial Screening Results

### *S. pneumoniae* D39pcomX::lacZ (ComD1)

Agonism assays were performed at 10  $\mu$ M concentration. CSP1 was used as the positive control (100%) while DMSO as the negative control (0%). Percent (%) *comX* activation was measured by normalizing the Miller units obtained for each peptide to that of CSP1. All peptides were screened in triplicates over three separate trials. Error bars indicate standard error of the mean of nine values.

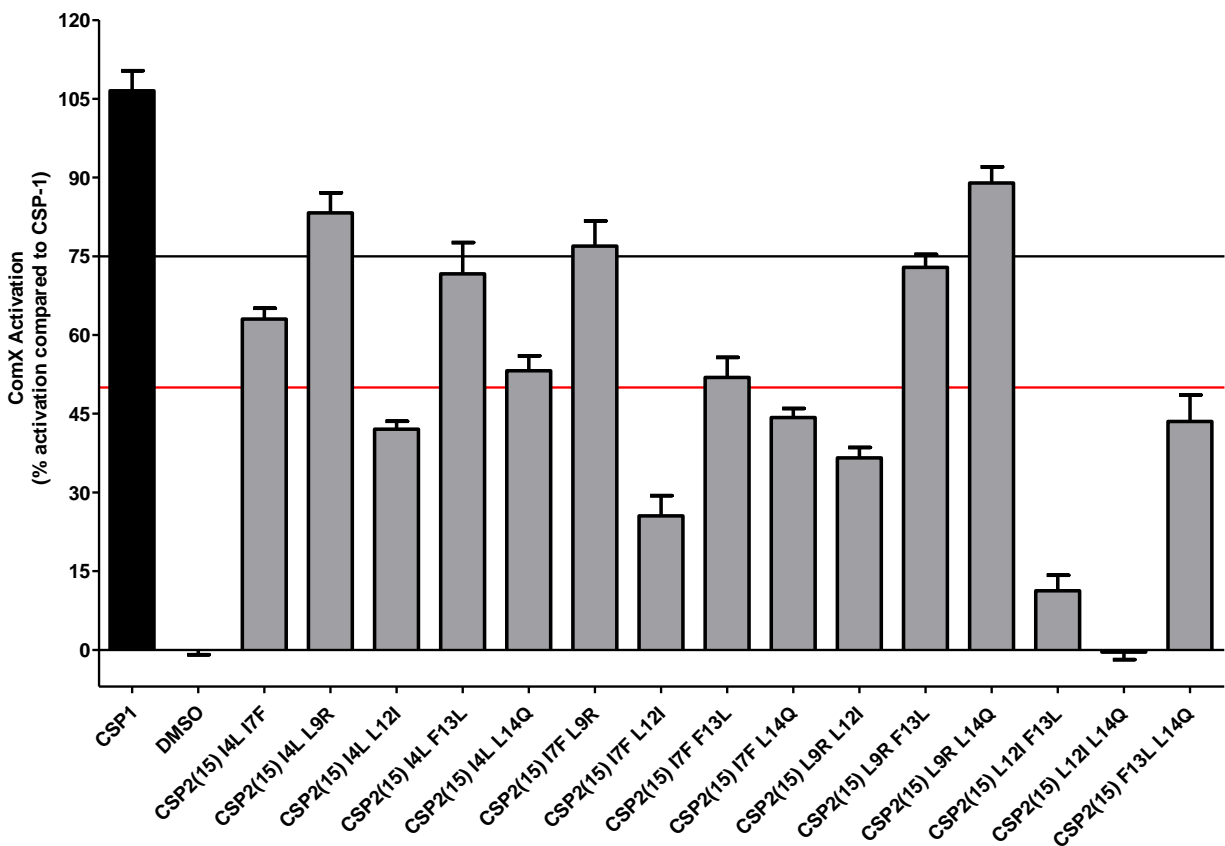

**Figure S-1.** Primary agonism screening assay data for the CSP2(15) double mutation library. Peptides that exhibited over 75% activation were further evaluated to determine their EC<sub>50</sub> while peptides that exhibited less than 50% activation were evaluated as potential competitive inhibitors.

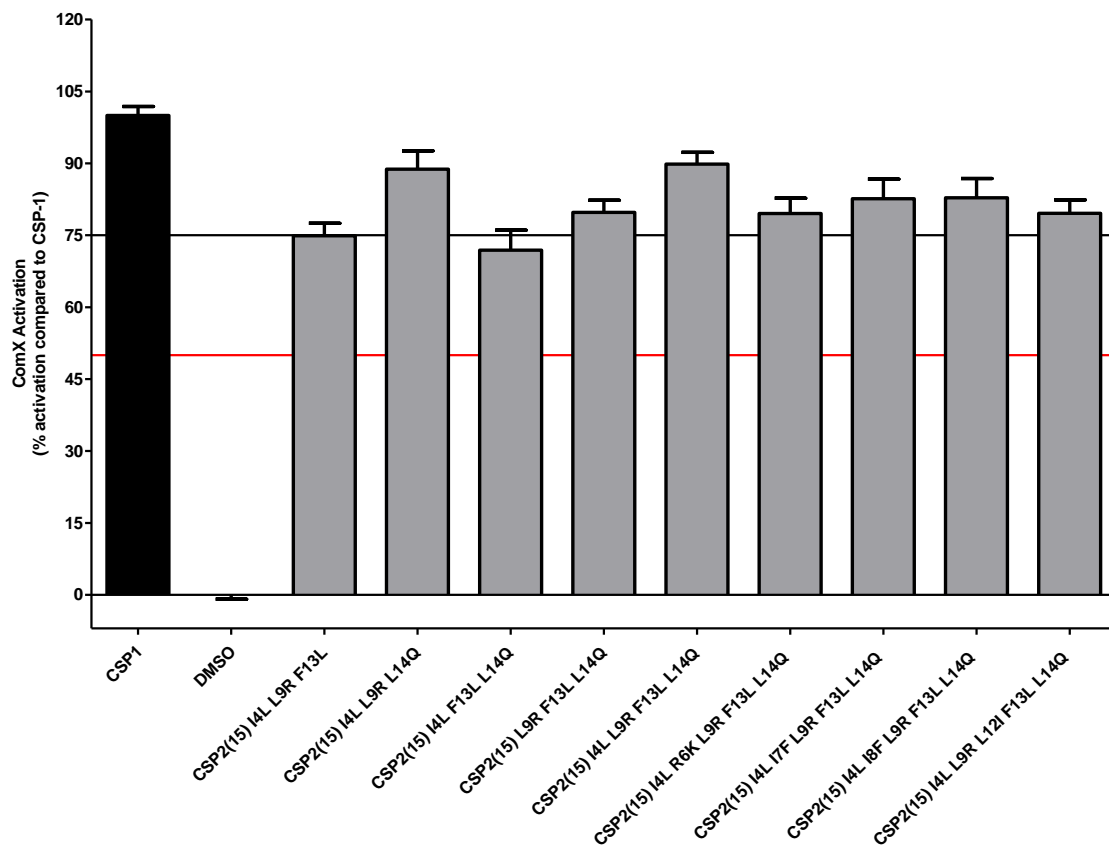

**Figure S-2.** Primary agonism screening assay data for the CSP2(15) triple, quadruple and quintuple mutation library. Peptides that exhibited over 75% activation were further evaluated to determine their EC<sub>50</sub>.

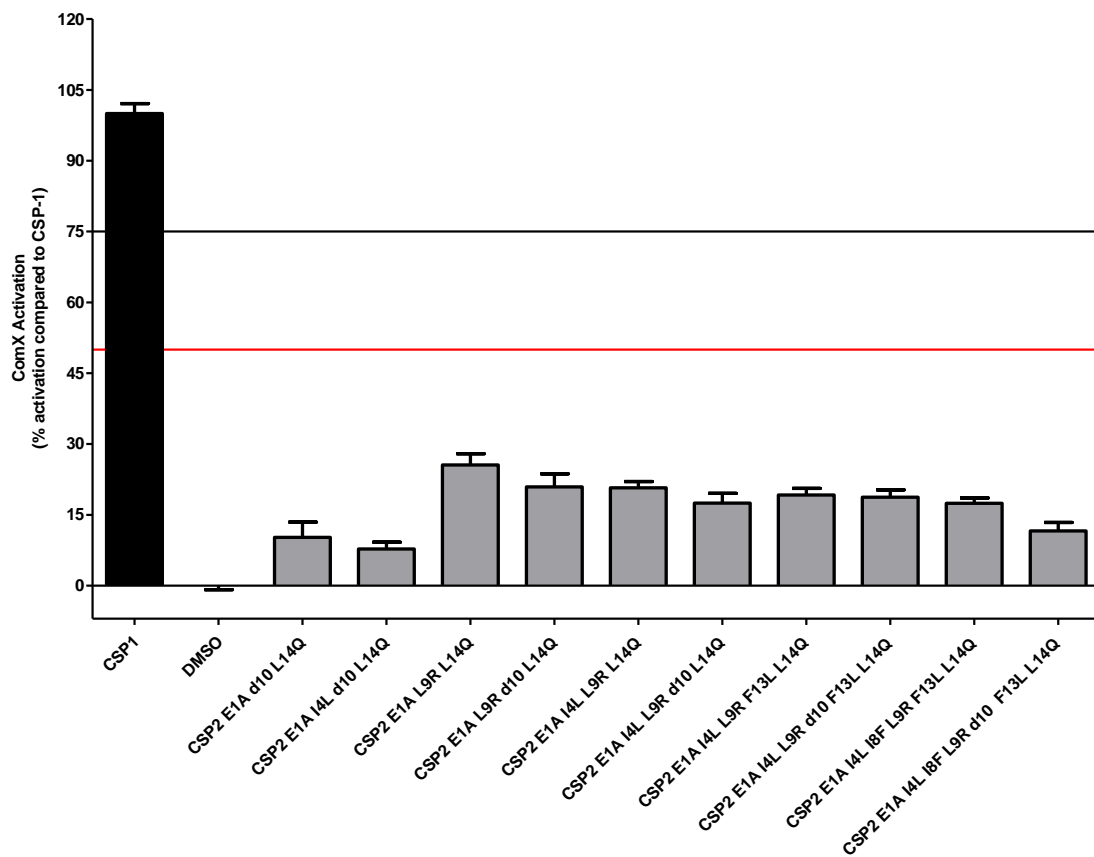

**Figure S-3.** Primary agonism screening assay data for the CSP2 E1A and d10 modification library. Peptides that exhibited less than 50% activation were evaluated as potential competitive inhibitors.

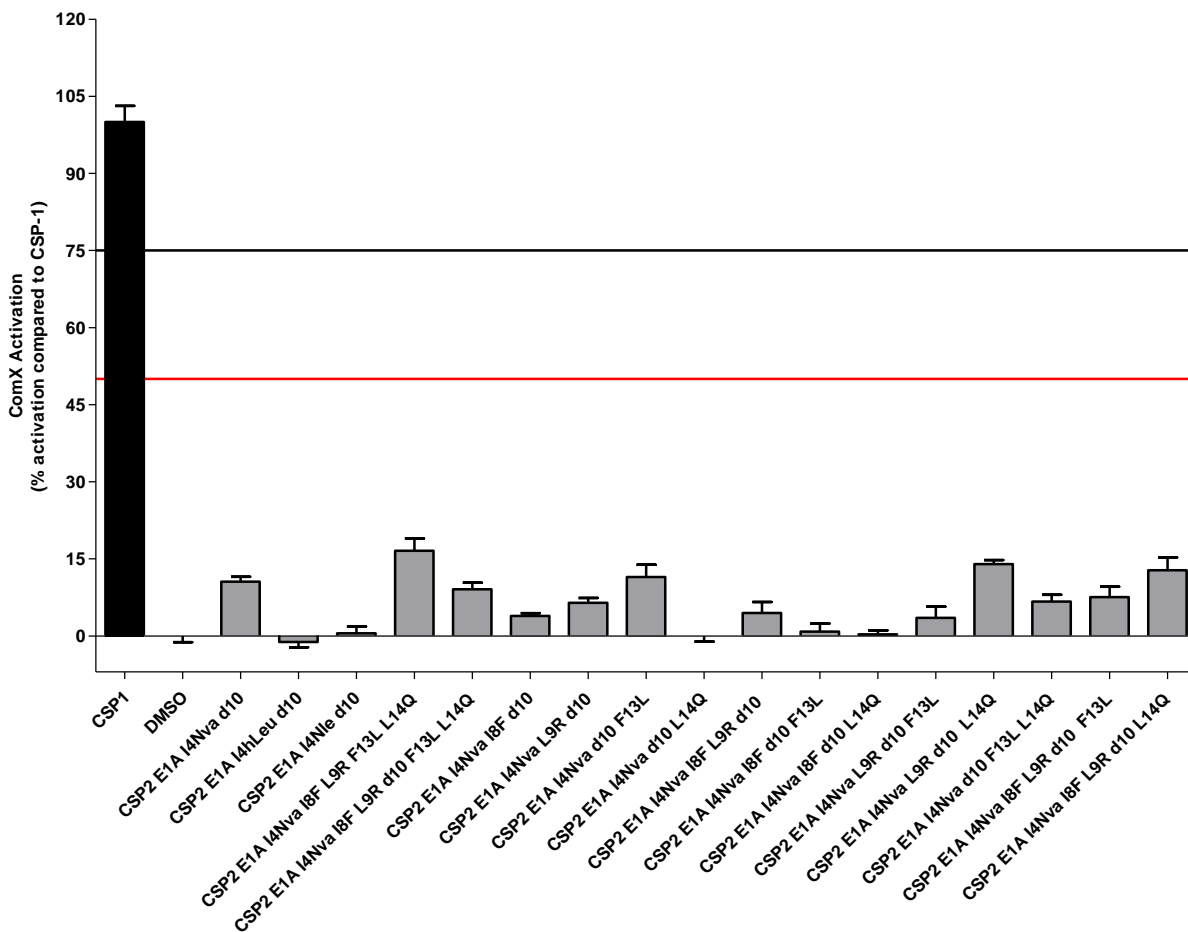

**Figure S-4.** Primary agonism screening assay data for the CSP2 non-proteogenic modification library. Peptides that exhibited less than 50% activation were evaluated as potential competitive inhibitors.

Antagonism assays were performed at 10  $\mu$ M concentration of peptides against 50 nM concentration of CSP1. CSP1 (50 nM) was used as the positive control (100%) while DMSO as the negative control (0%). Percent (%) *comX* activation was measured by normalizing the Miller units obtained for each peptide to that of CSP1. All peptides were screened in triplicates over three separate trials. Error bars indicate standard error of the mean of nine values.

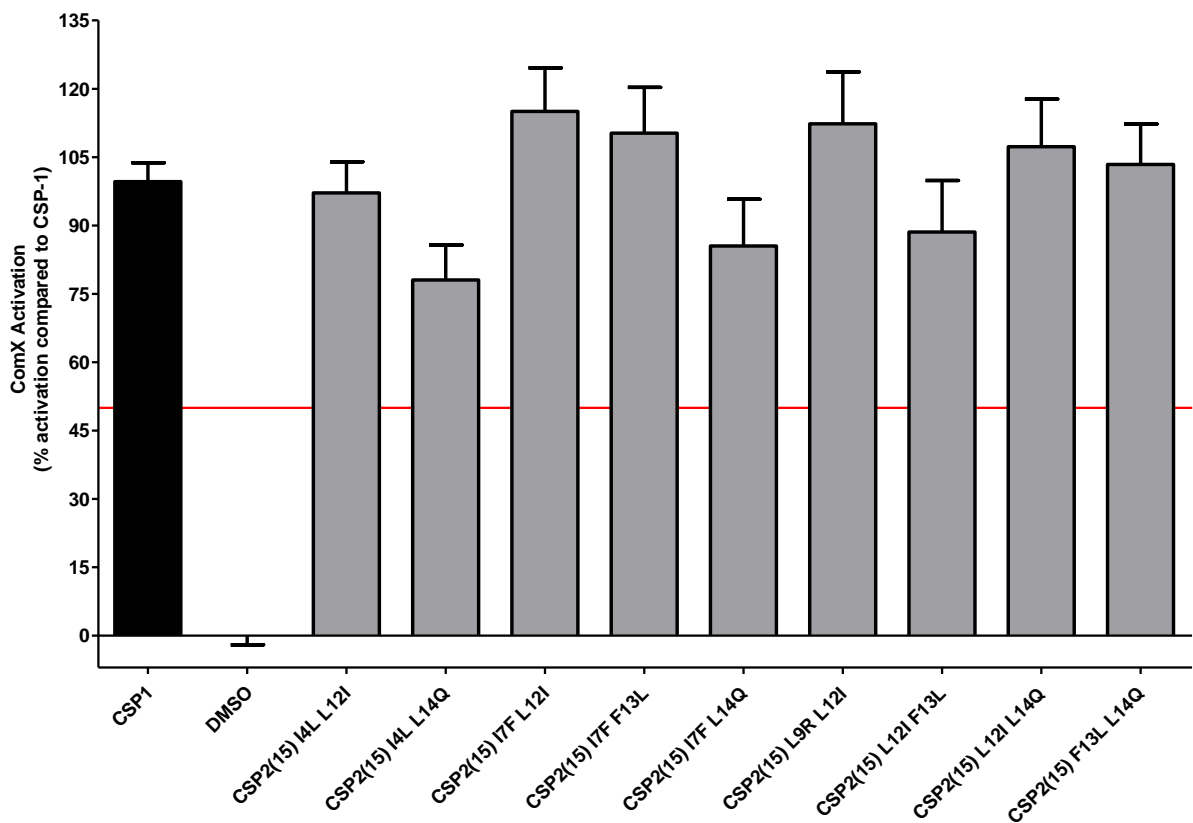

**Figure S-5.** Primary antagonism screening assay data for the CSP2(15) double mutation library. None of the analogs exhibited less than 50% activation.

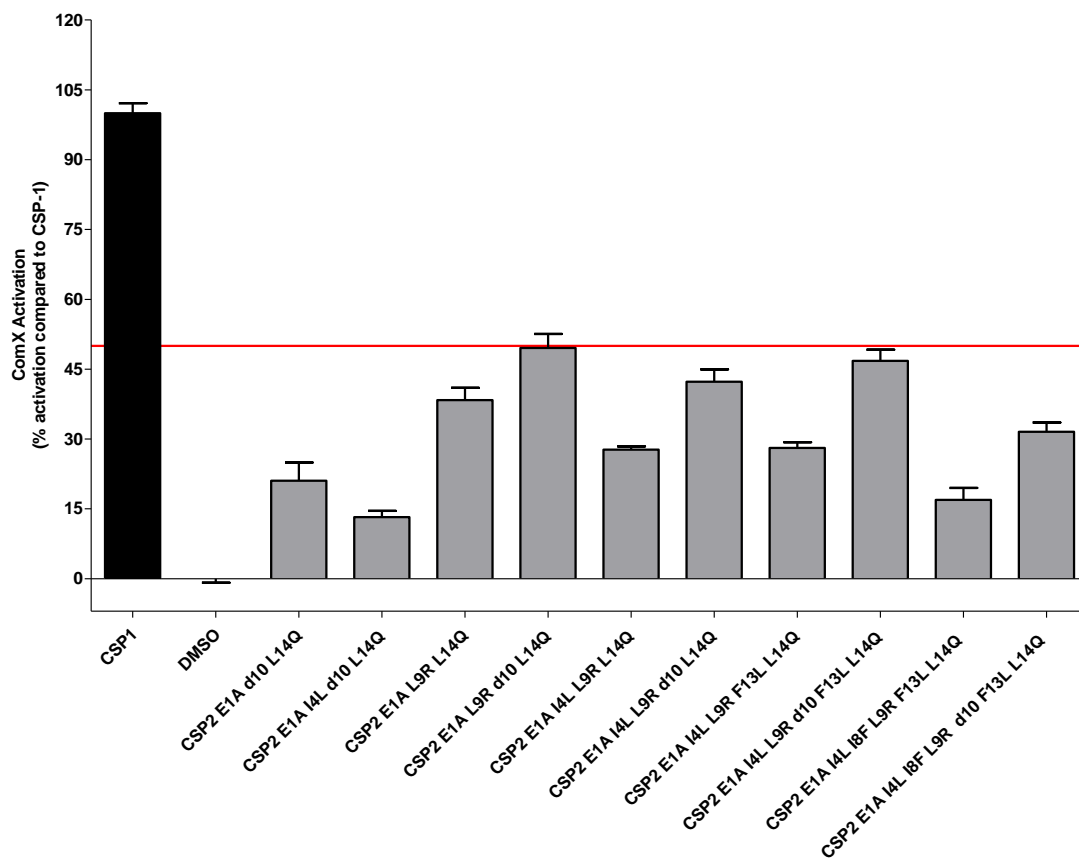

**Figure S-6.** Primary antagonism screening assay data for the CSP2 E1A and d10 modification library. Peptides that exhibited less than 50% activation were further evaluated to determine their  $IC_{50}$ .



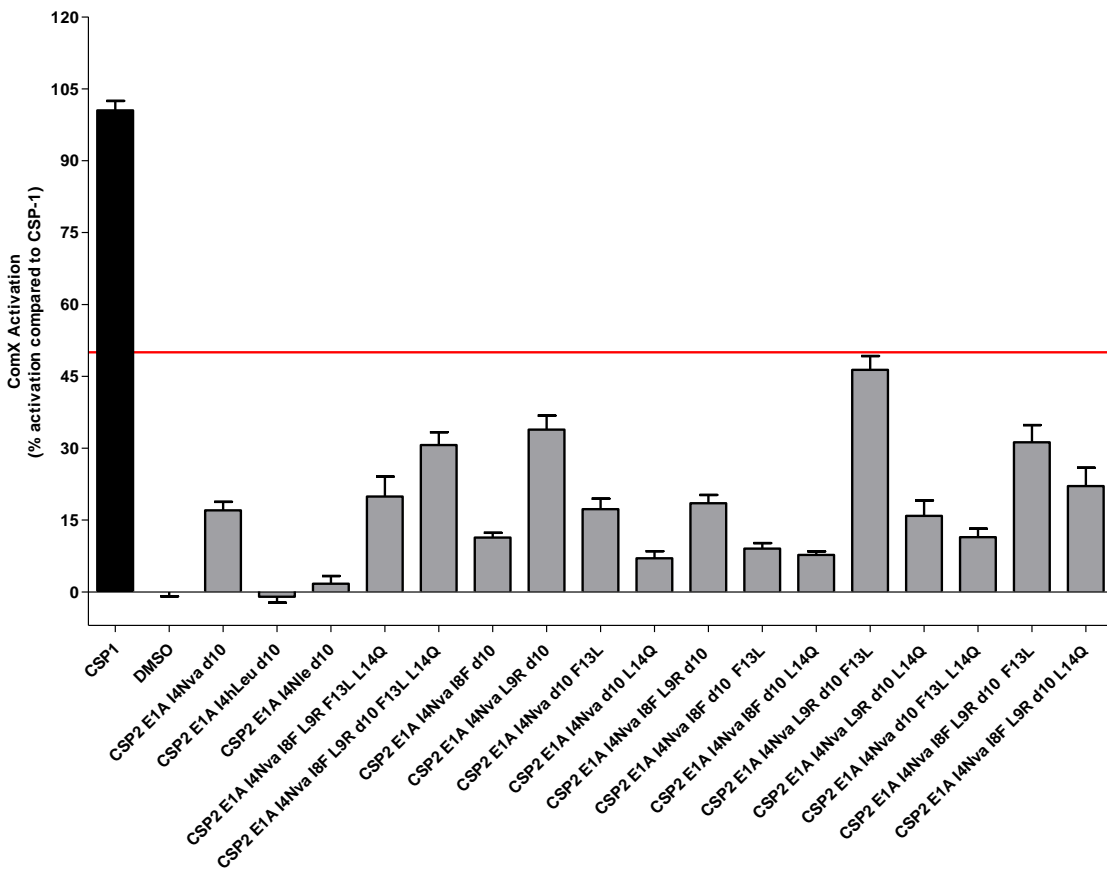

**Figure S-7.** Primary antagonism screening assay data for the non-proteogenic modification of CSP2 libraries. Peptides that exhibited less than 50% activation were further evaluated to determine their IC<sub>50</sub>.

***S. pneumoniae* TIGR4pcomX::lacZ (ComD2)**

Agonism assays were performed at 10  $\mu$ M concentration. CSP2 was used as the positive control (100%) while DMSO as the negative control (0%). Percent (%) *comX* activation was measured by normalizing the Miller units obtained for each peptide to that of CSP2. All peptides were screened in triplicates over three separate trials. Error bars indicate standard error of the mean of nine values.

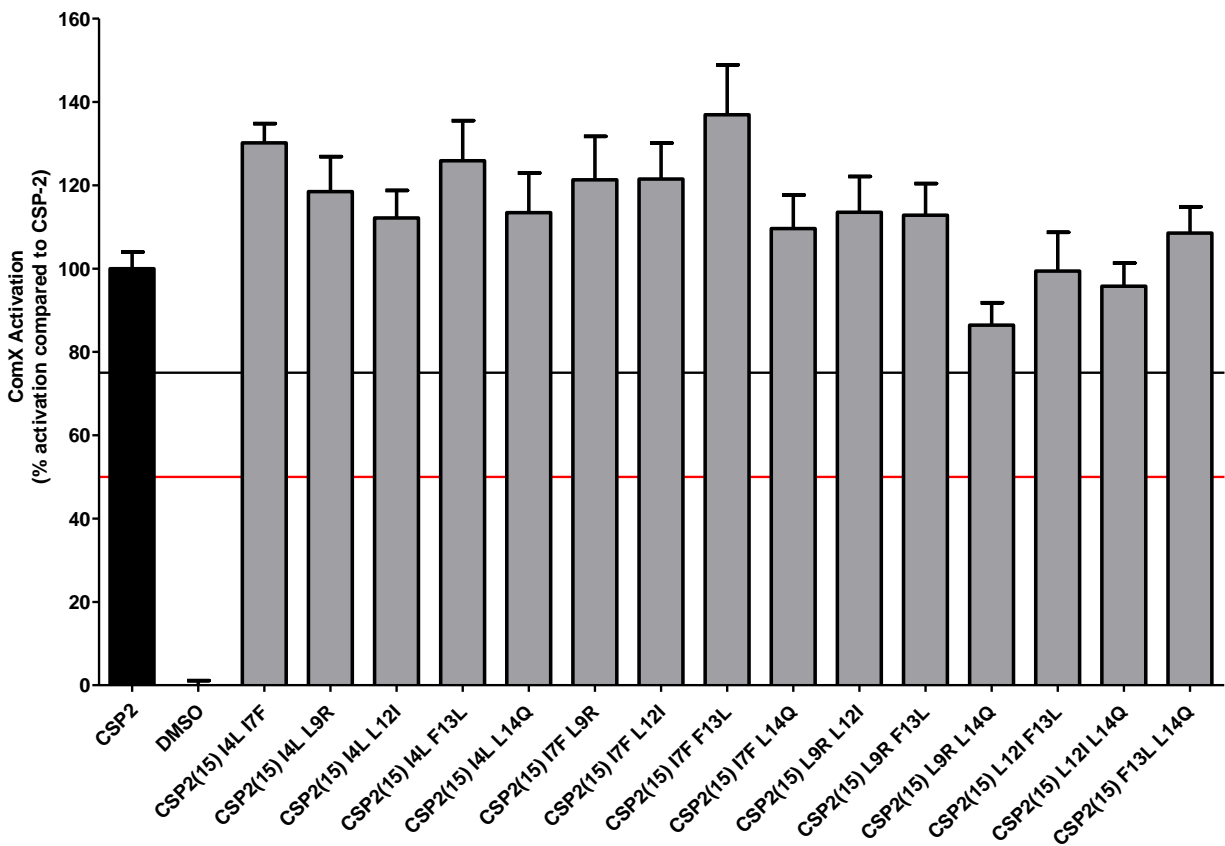

**Figure S-8.** Primary agonism screening assay data for the CSP2(15) double mutation library. Peptides that exhibited over 75% activation were further evaluated to determine their EC<sub>50</sub>.

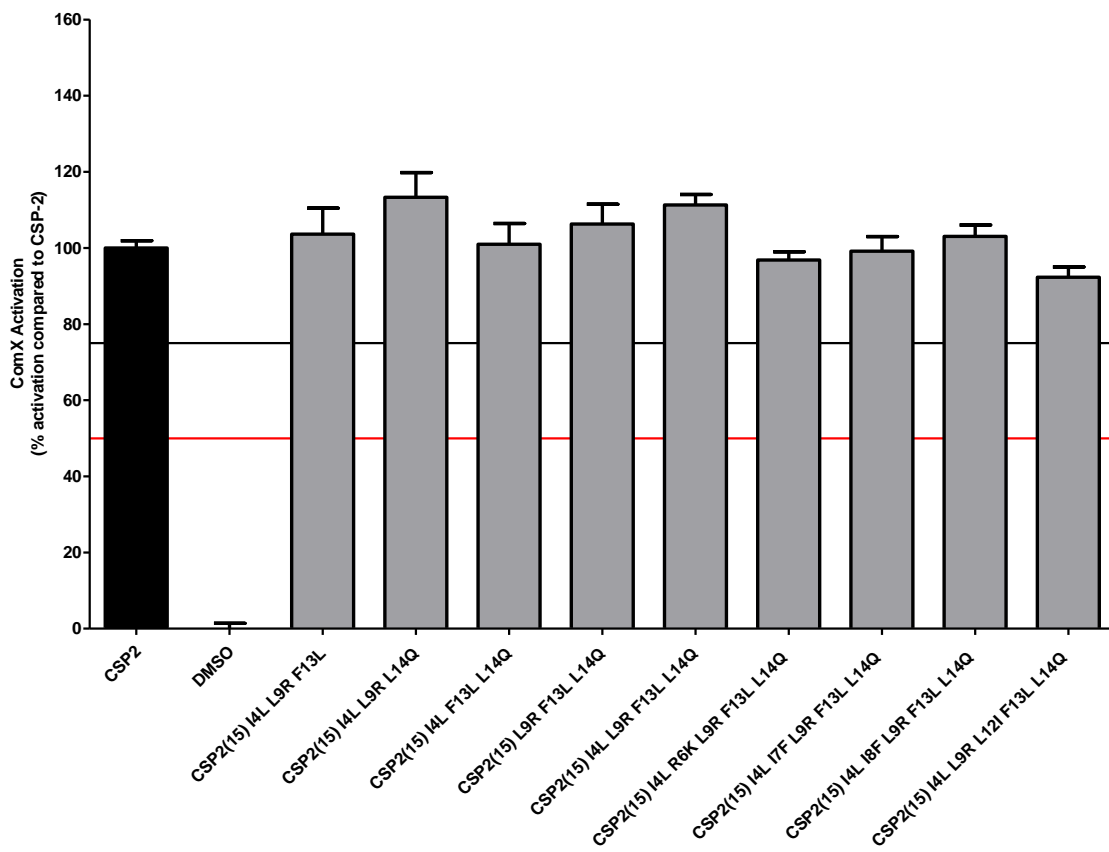

**Figure S-9.** Primary agonism screening assay data for the CSP2(15) triple, quadruple and quintuple mutation library. Peptides that exhibited over 75% activation were further evaluated to determine their EC<sub>50</sub>.

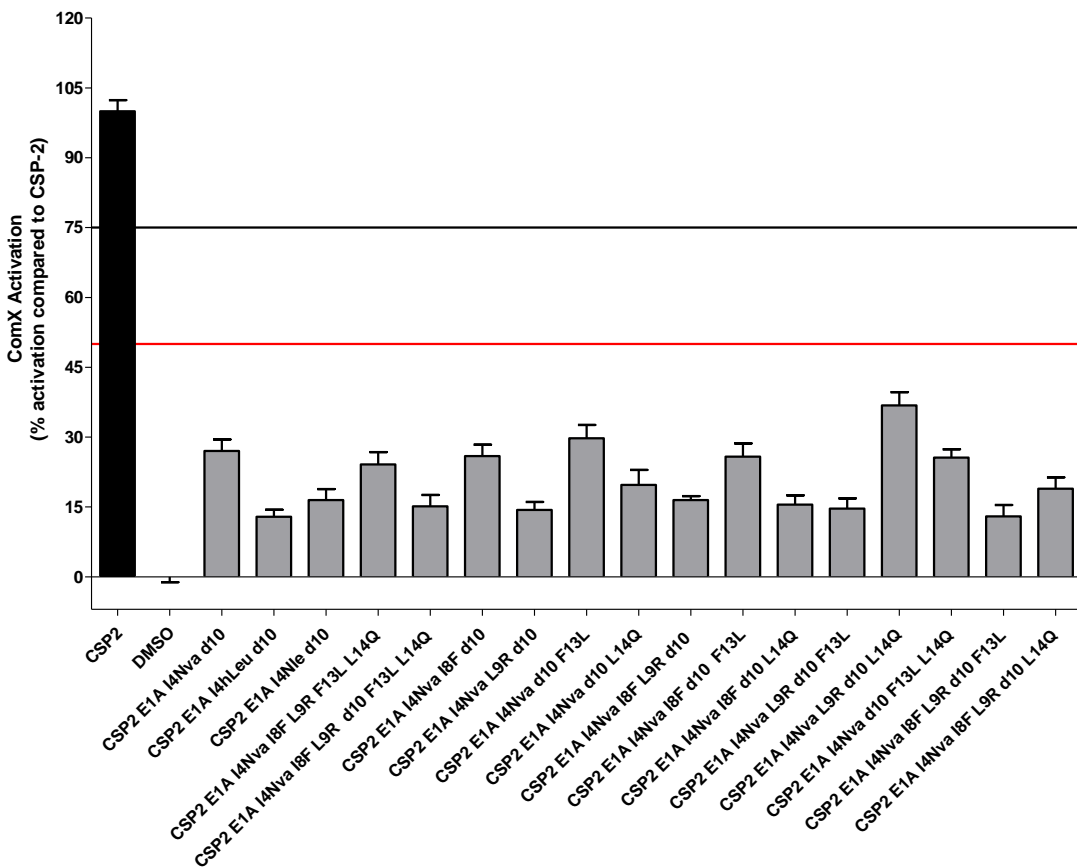

**Figure S-10.** Primary agonism screening assay data for the CSP2 non-proteogenic modification library. Peptides that exhibited less than 50% activation were evaluated as potential competitive inhibitors.

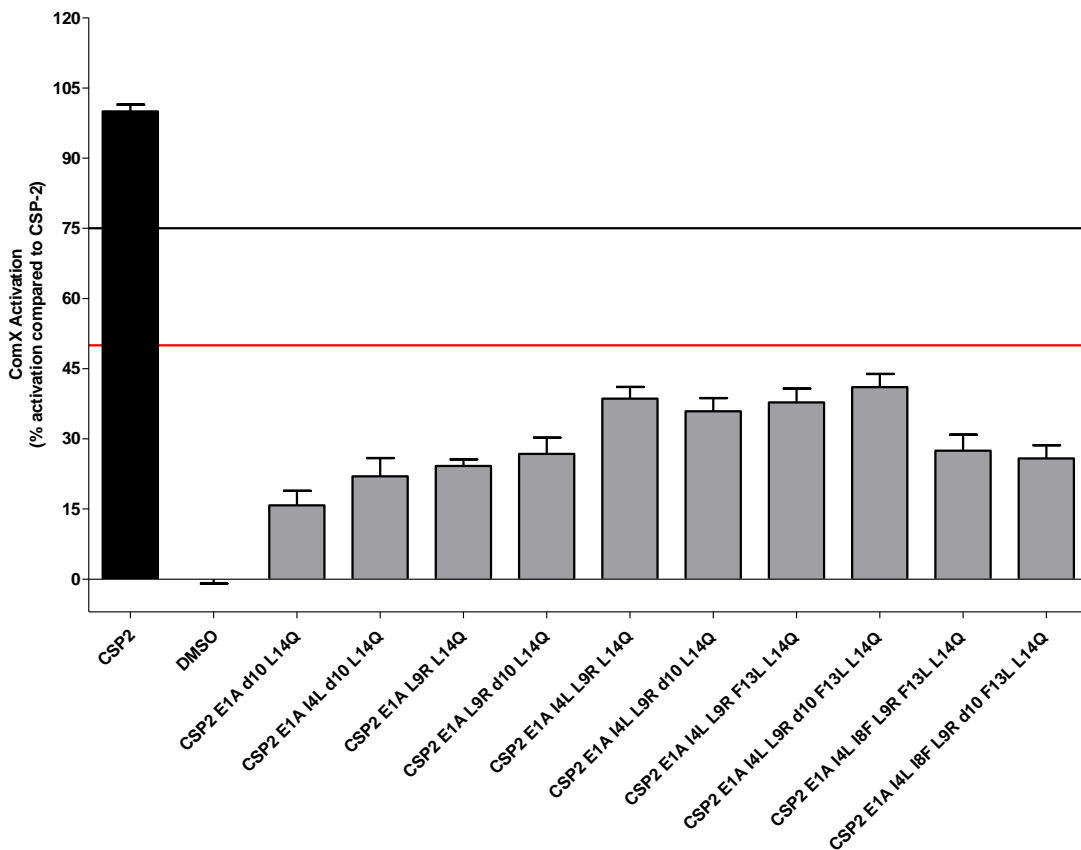

**Figure S-11.** Primary agonism screening assay data for the CSP2 E1A and d10 modification library. Peptides that exhibited less than 50% activation were evaluated as potential competitive inhibitors.

Antagonism assays were performed at 10  $\mu$ M concentration of peptides against 250 nM concentration of CSP2. CSP2 (250 nM) was used as the positive control (100%) while DMSO as the negative control (0%). Percent (%) *comX* activation was measured by normalizing the Miller units obtained for each peptide to that of CSP2. All peptides were screened in triplicates over three separate trials. Error bars indicate standard error of the mean of nine values.

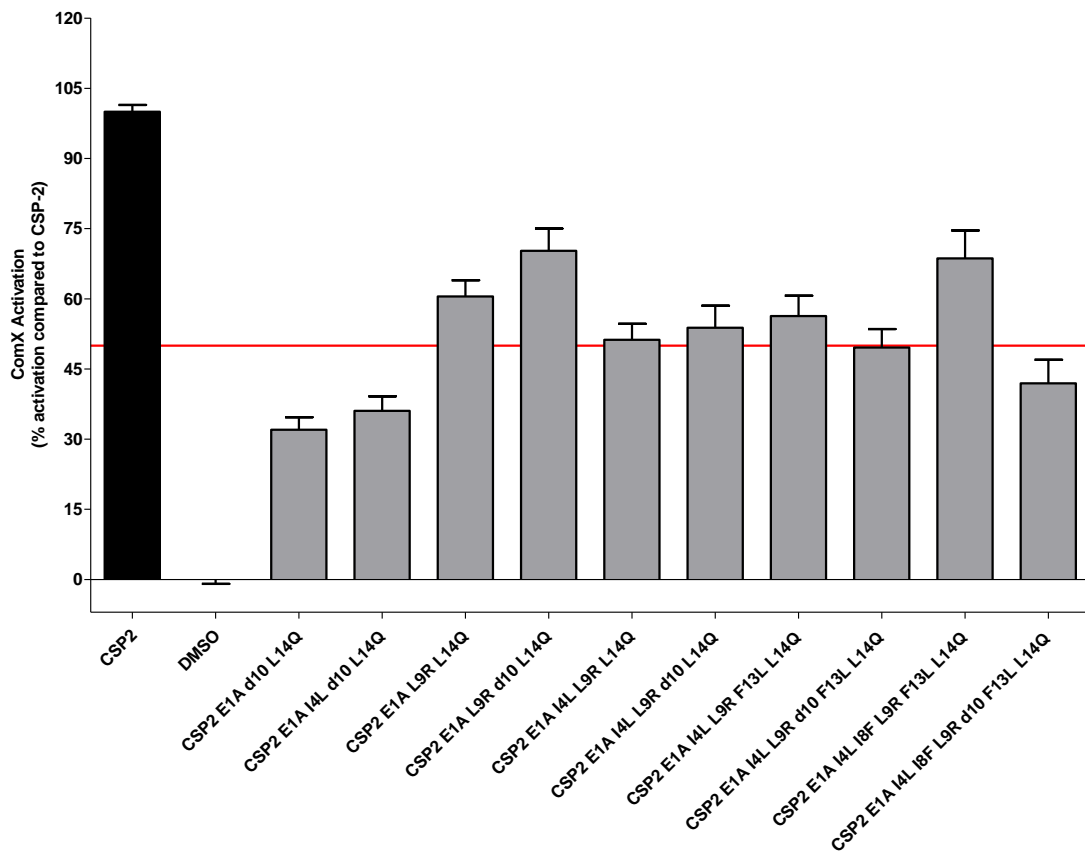

**Figure S-12.** Primary antagonism screening assay data for the CSP2 E1A and d10 modification library. Peptides that exhibited less than 50% activation were further evaluated to determine their IC<sub>50</sub>.

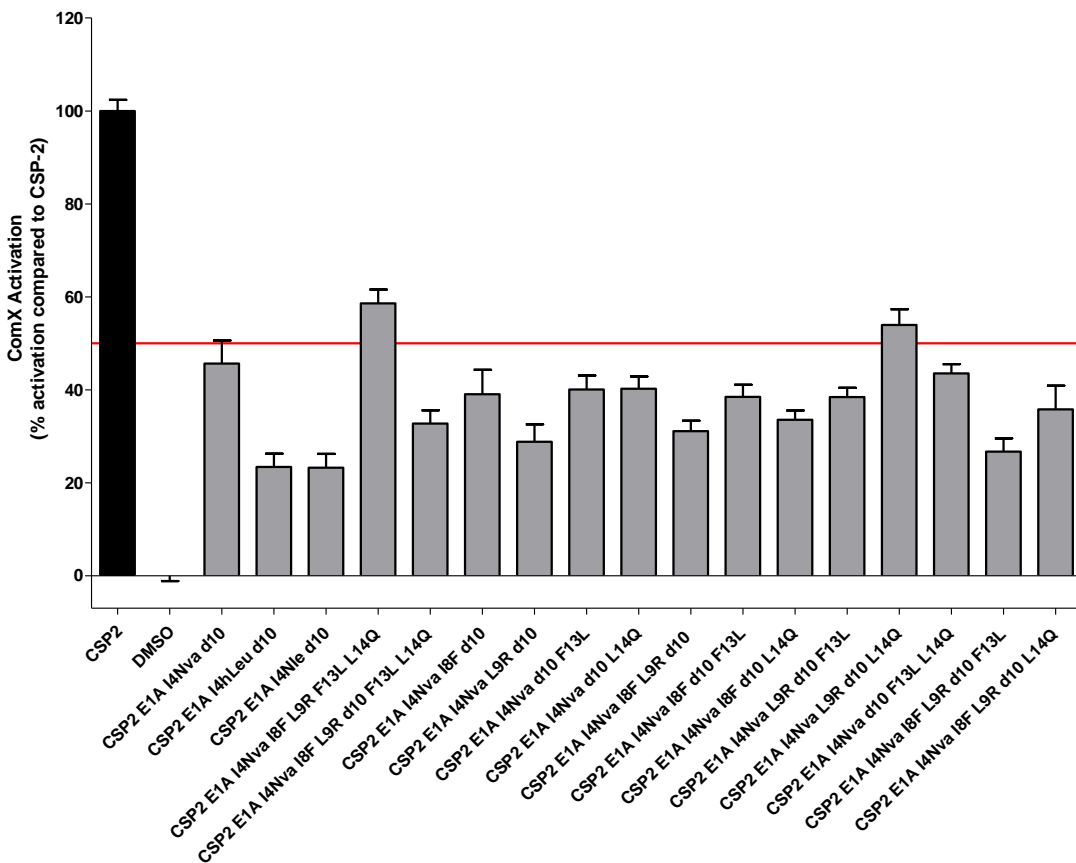

**Figure S-13.** Primary antagonism screening assay data for the CSP2 non-proteogenic modification library. Peptides that exhibited less than 50% activation were further evaluated to determine their IC<sub>50</sub>.

# Dose Response Curves

## *S. pneumoniae* D39pcomX::lacZ (ComD1)

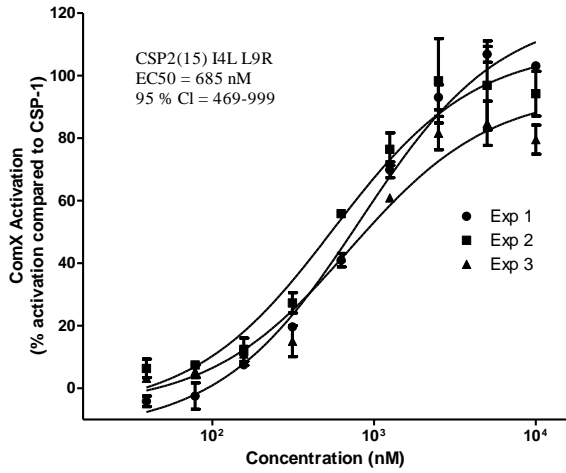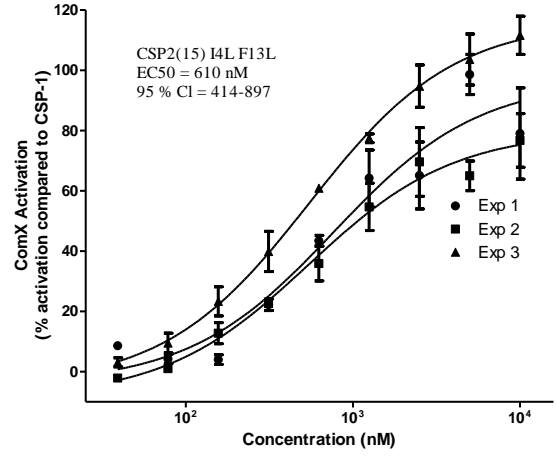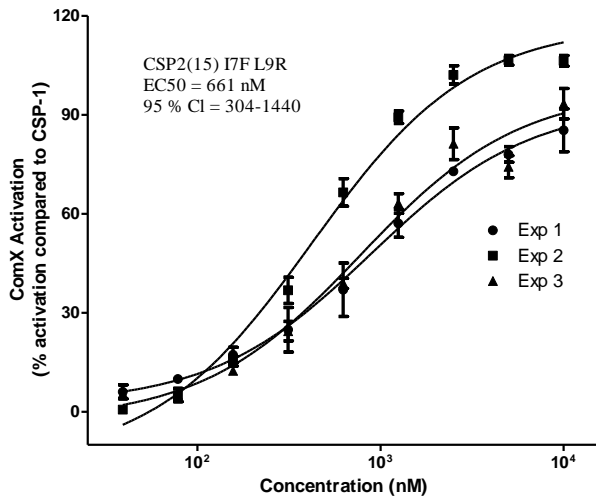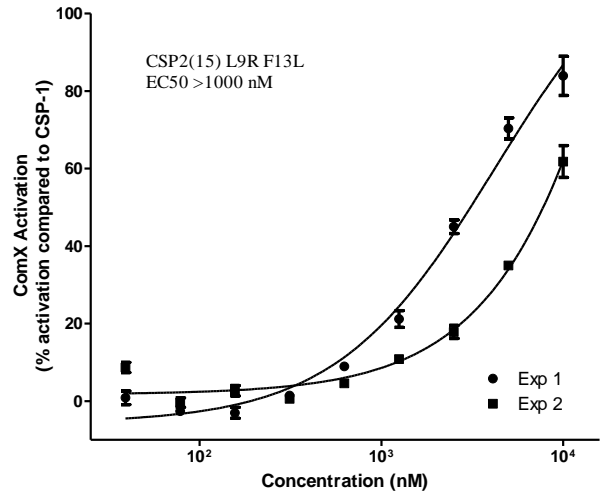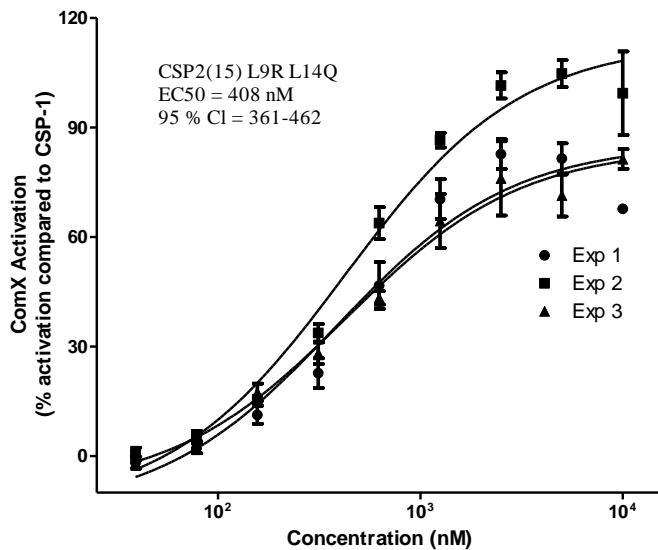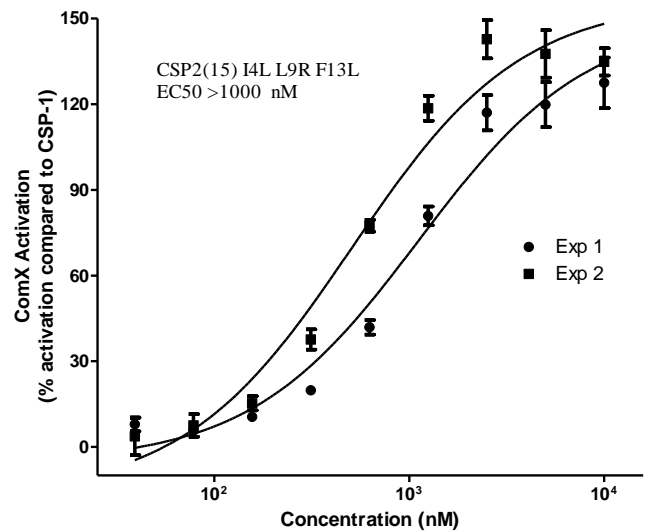



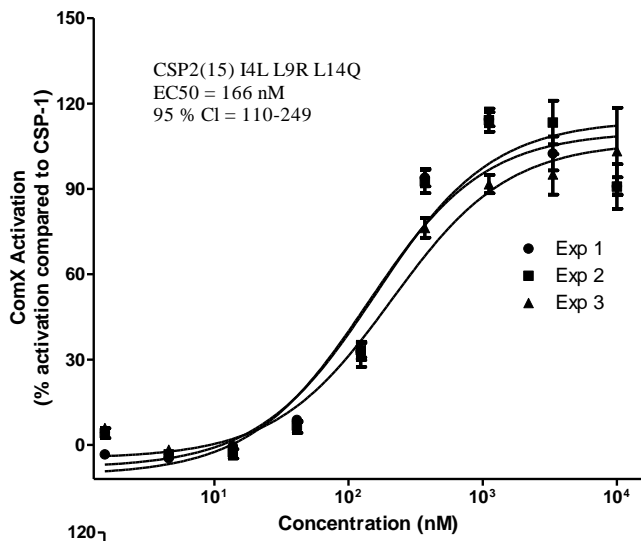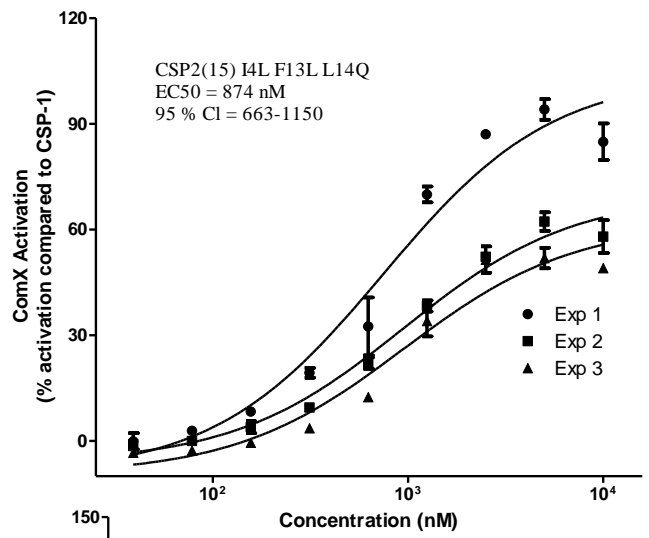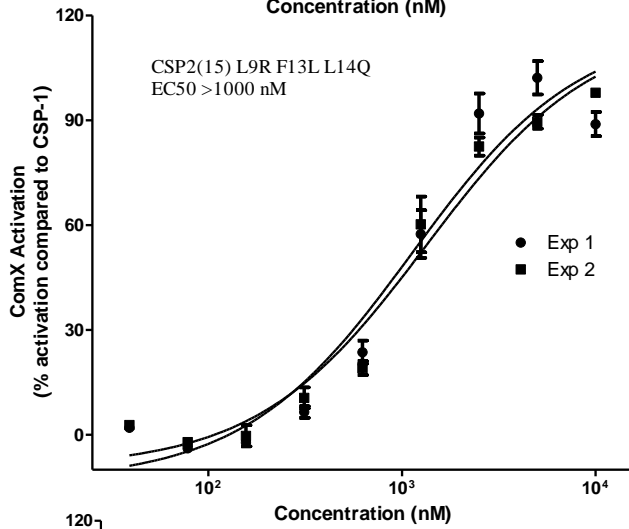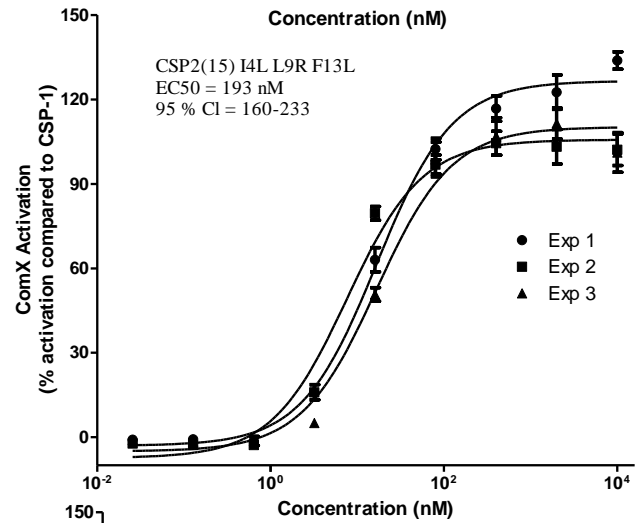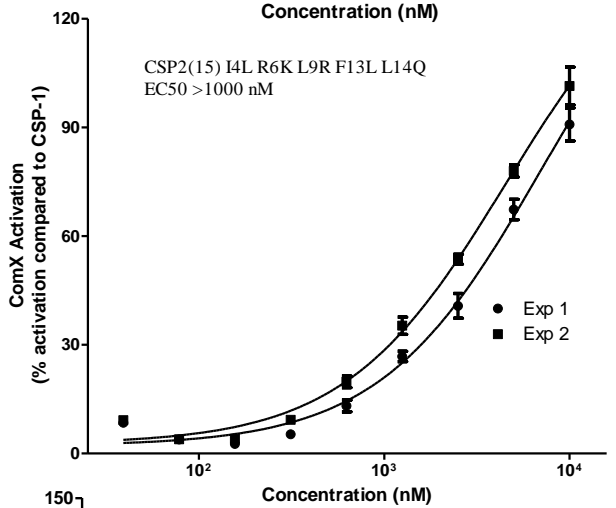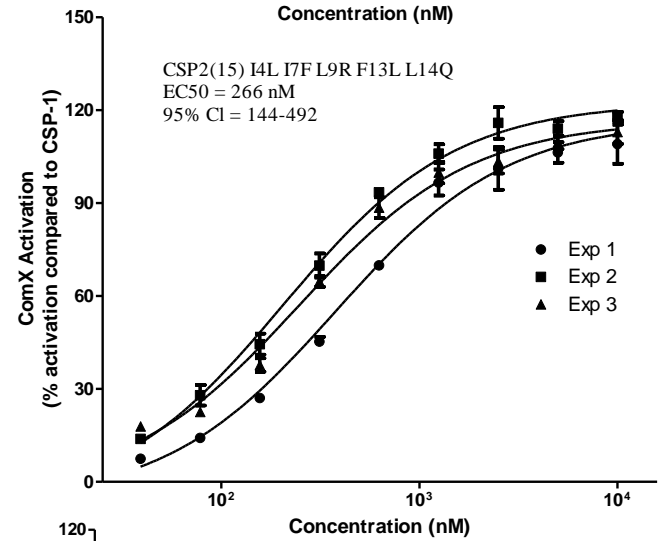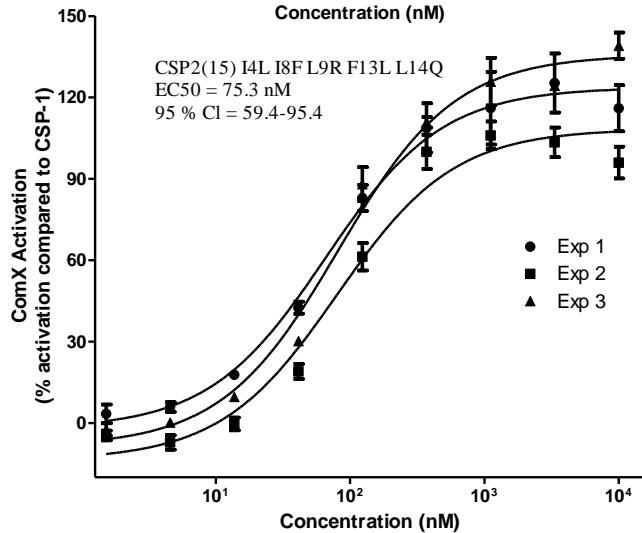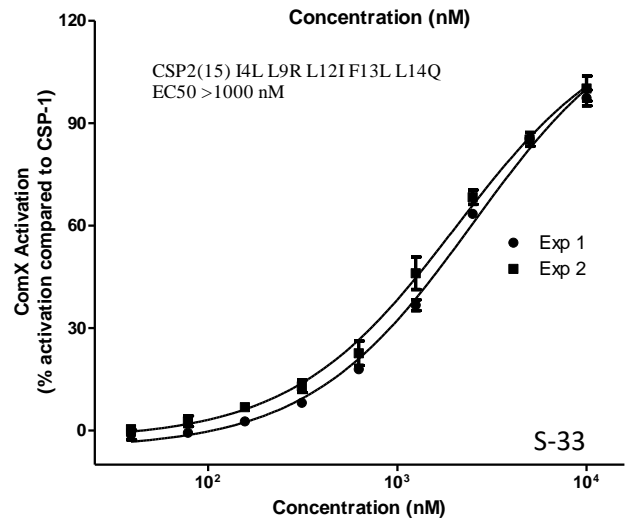

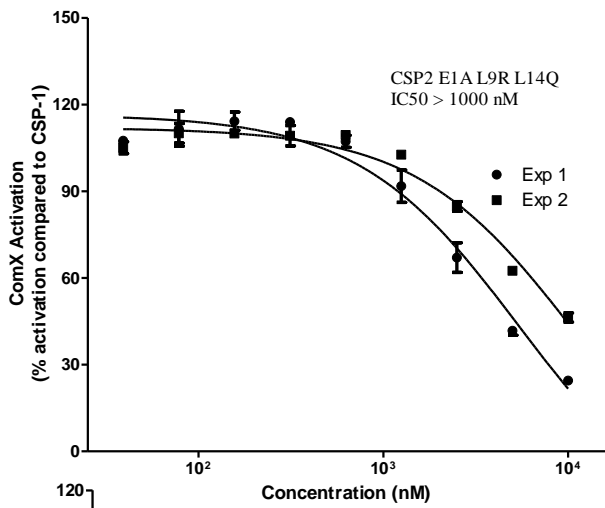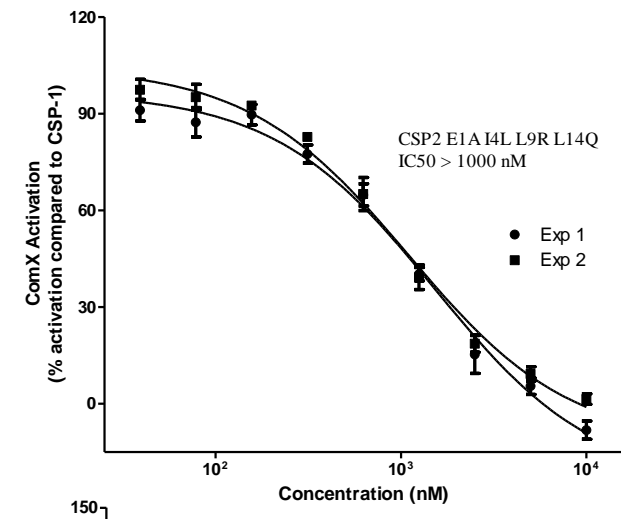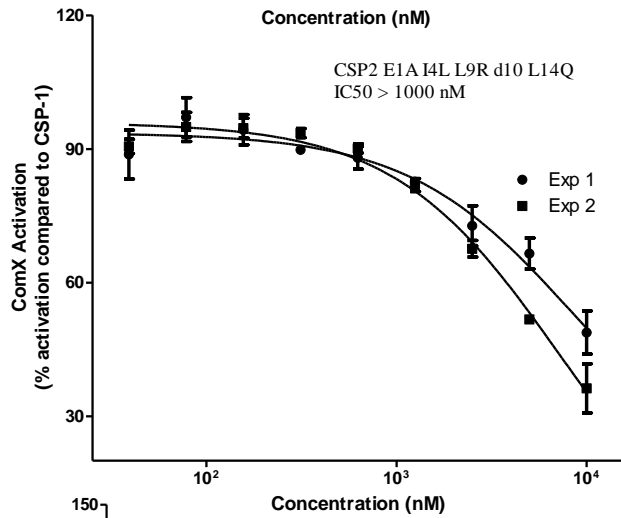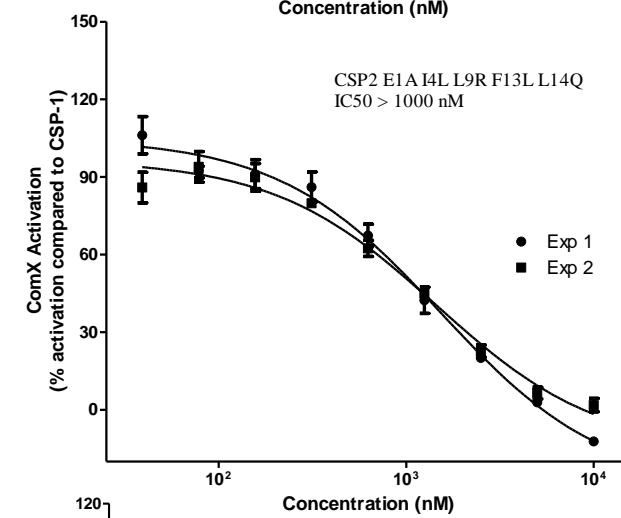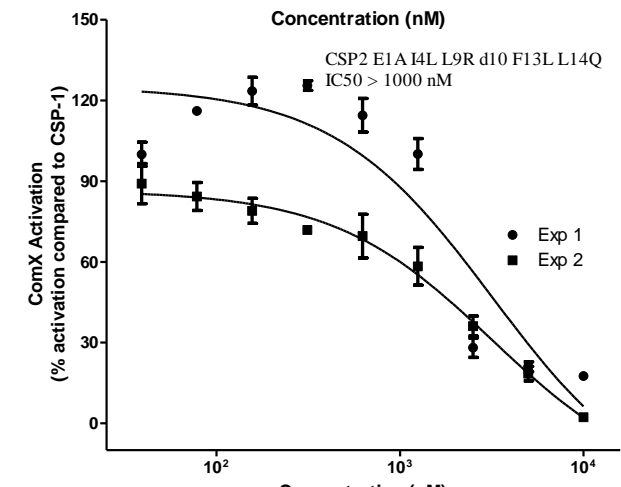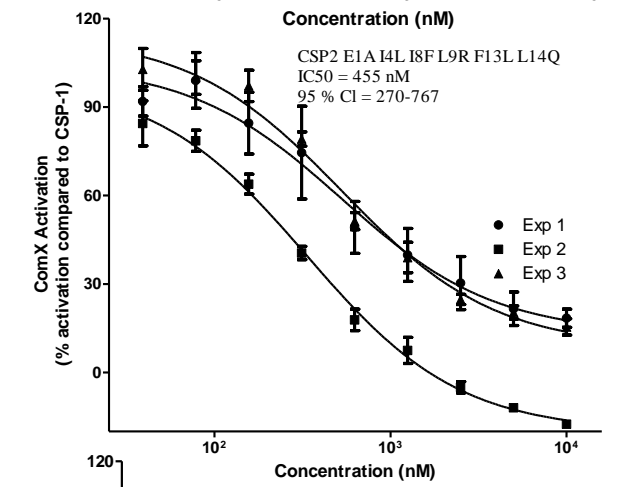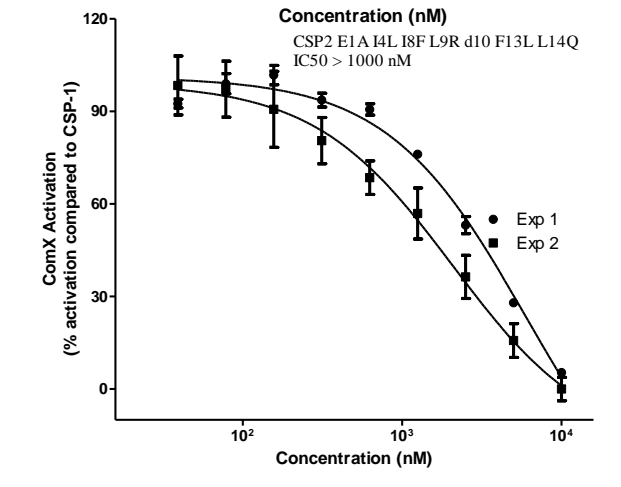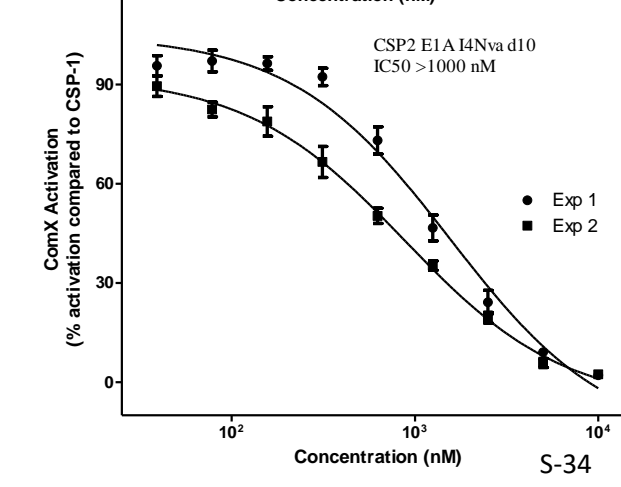

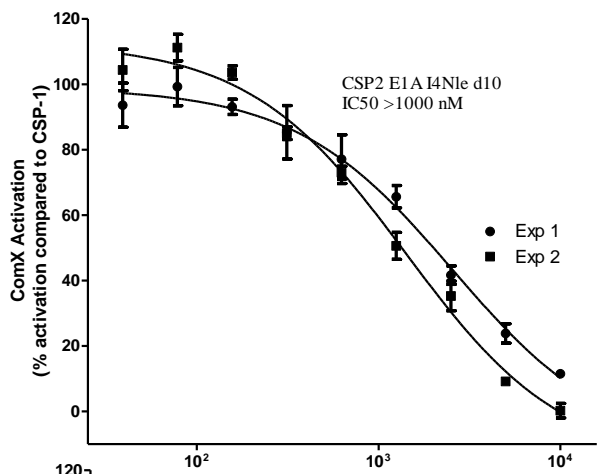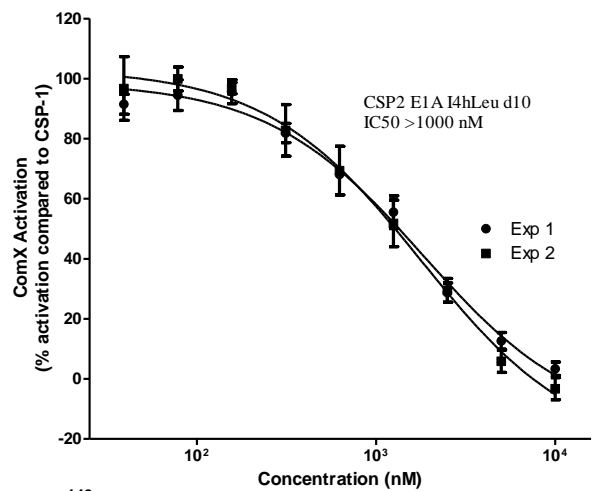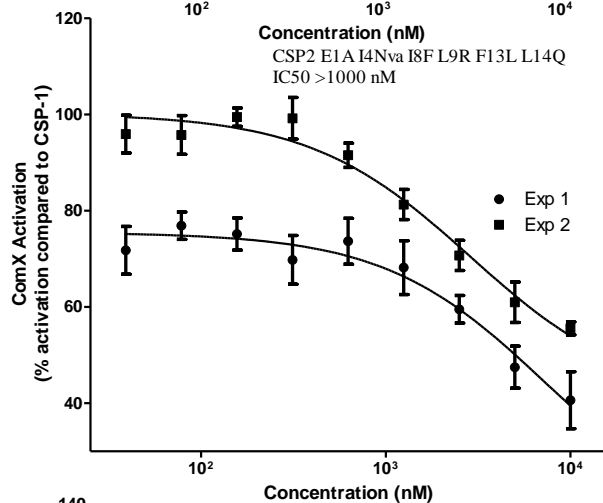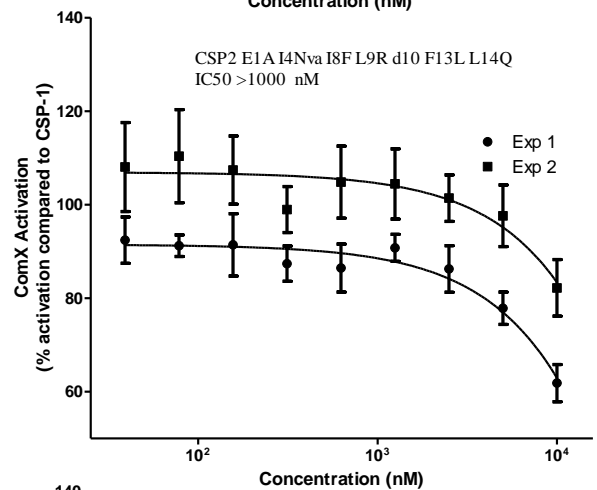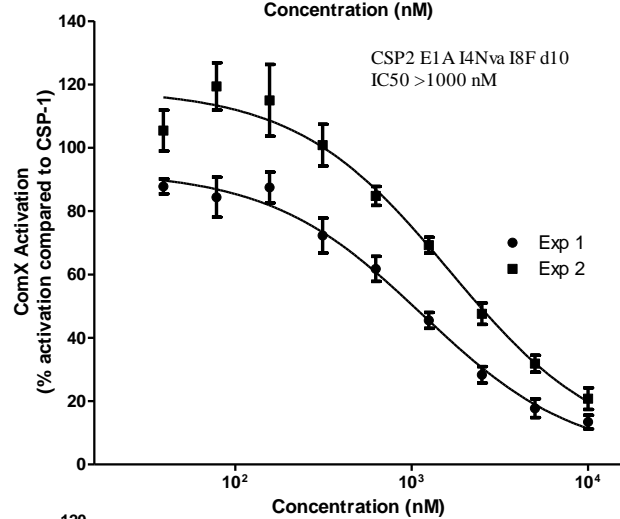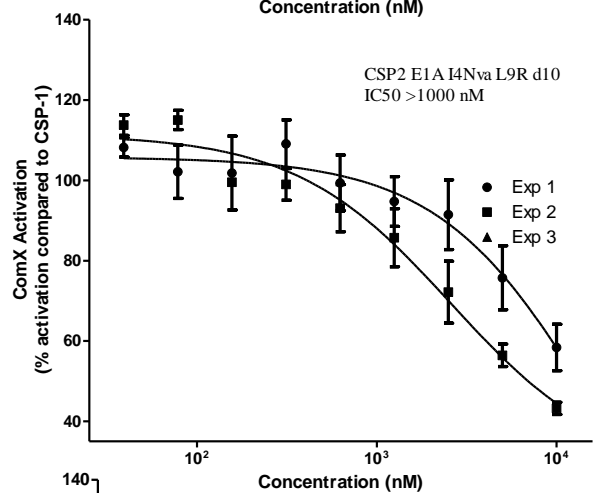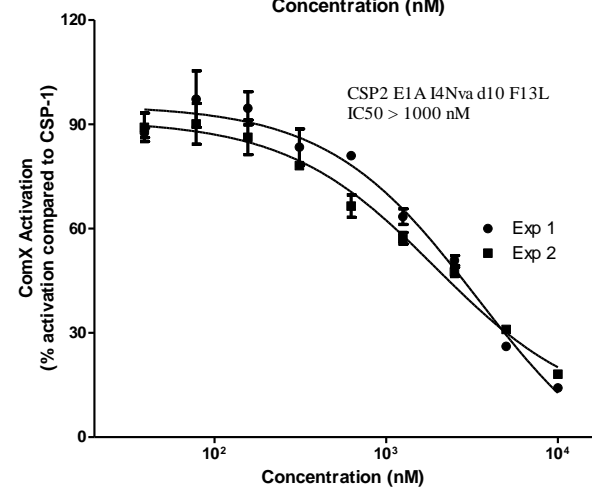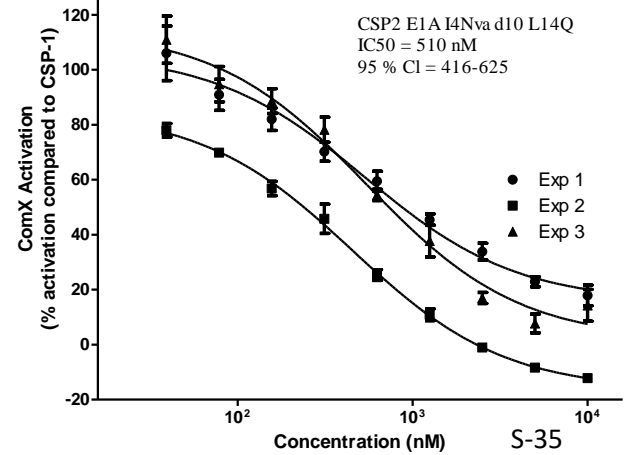

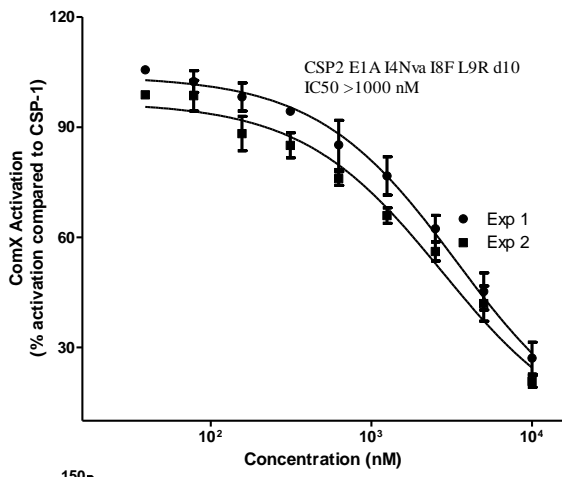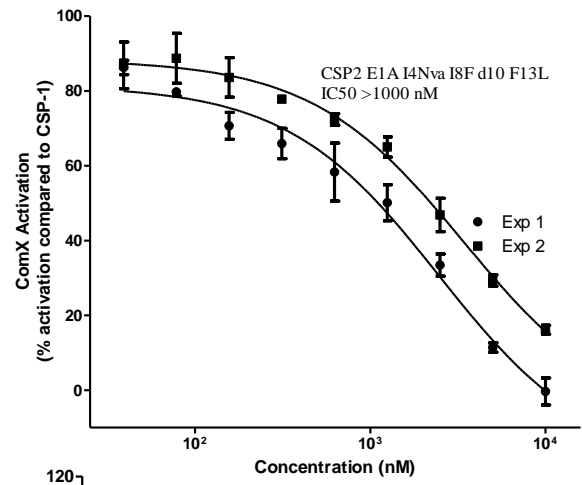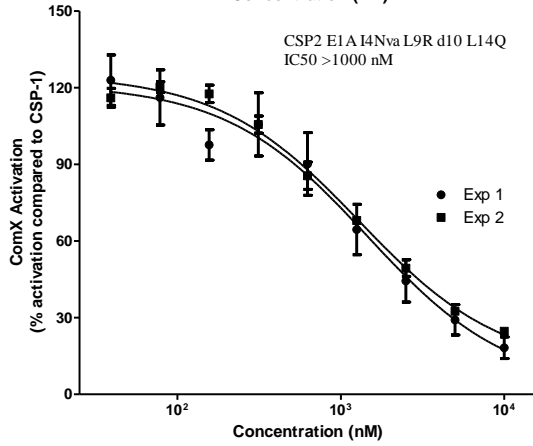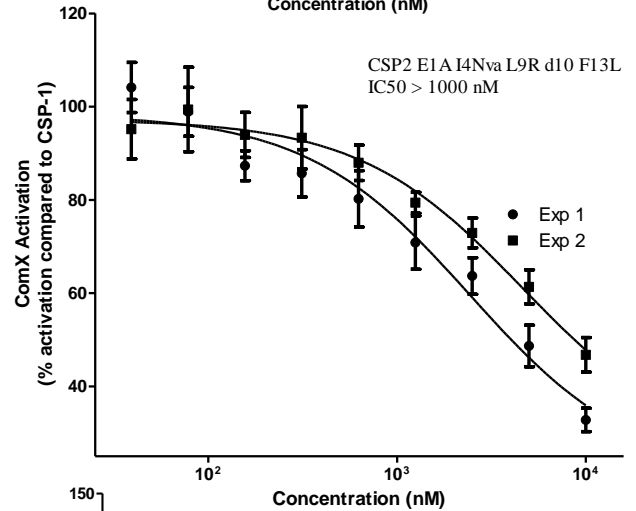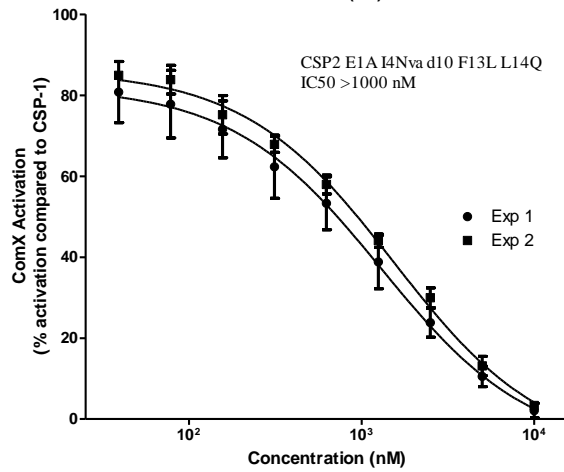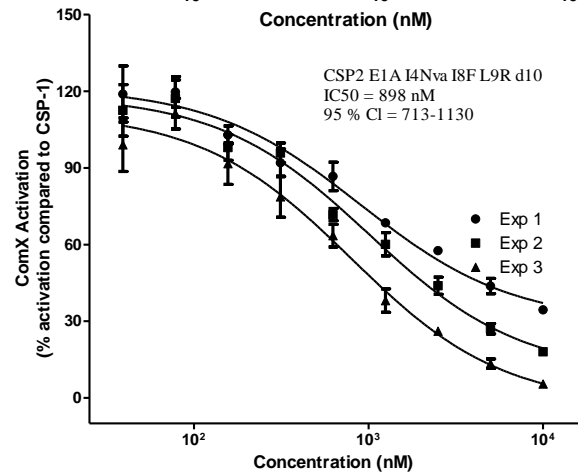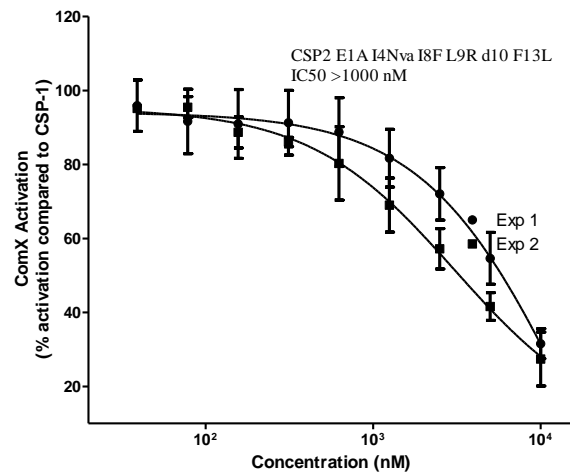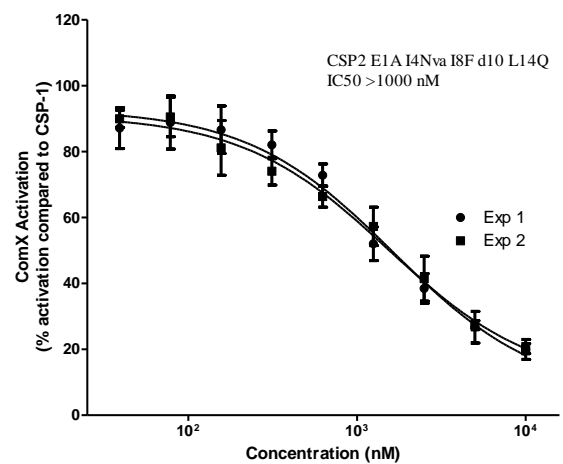

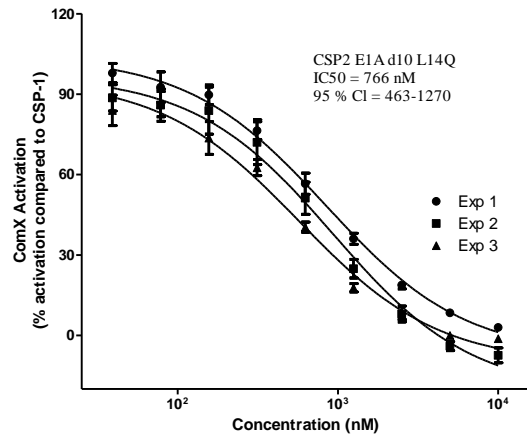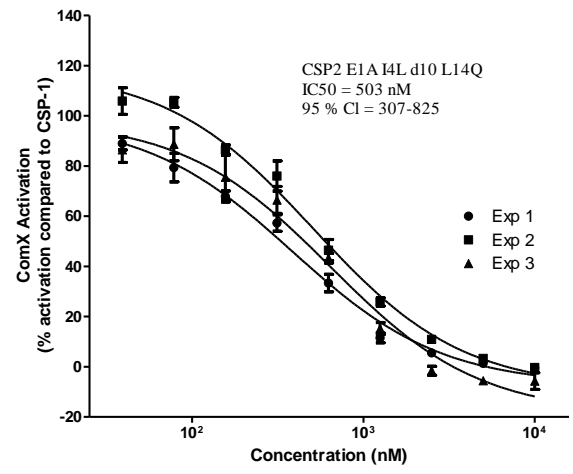

*S. pneumoniae* TIGR4pcomX::lacZ (ComD2)

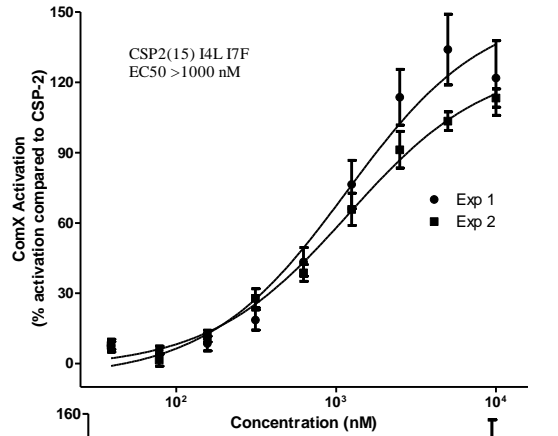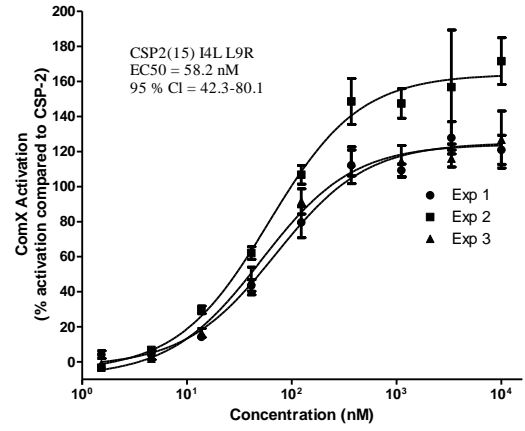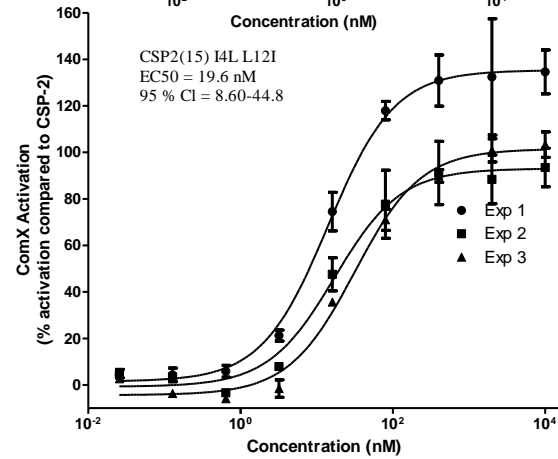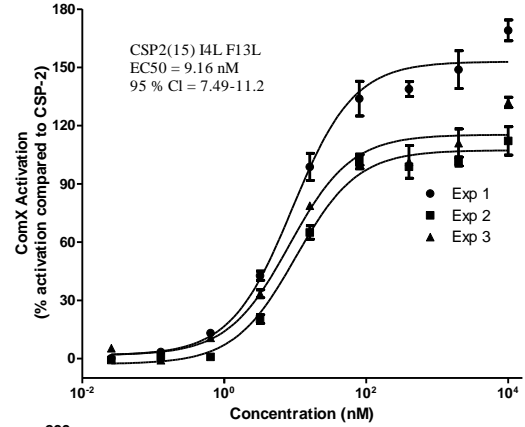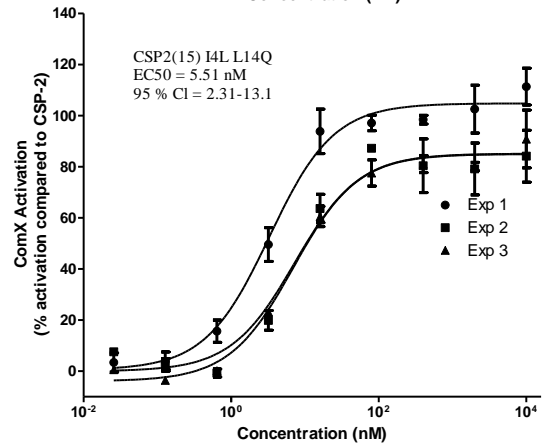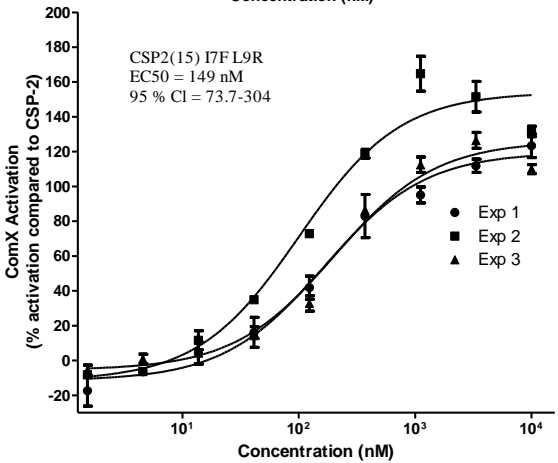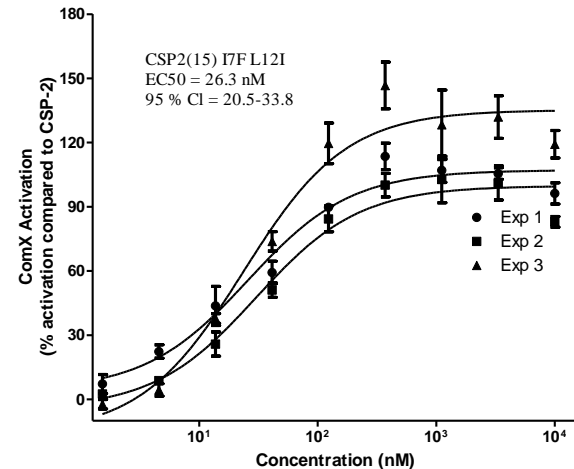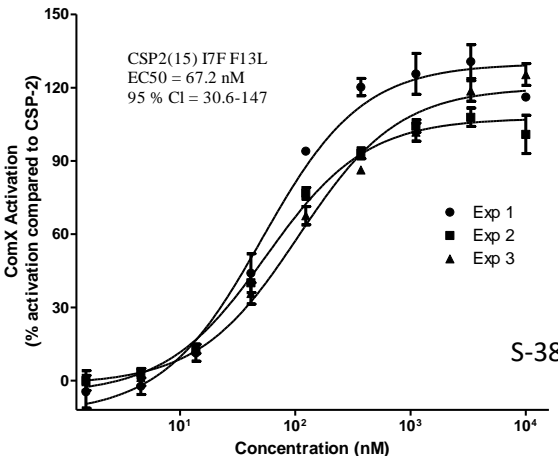

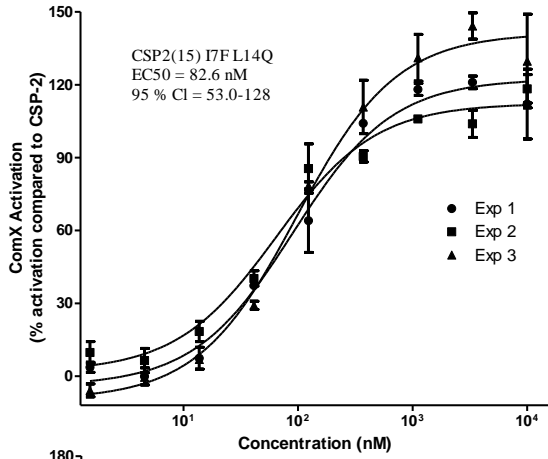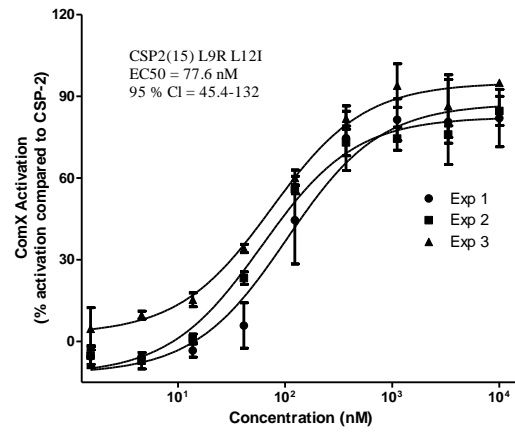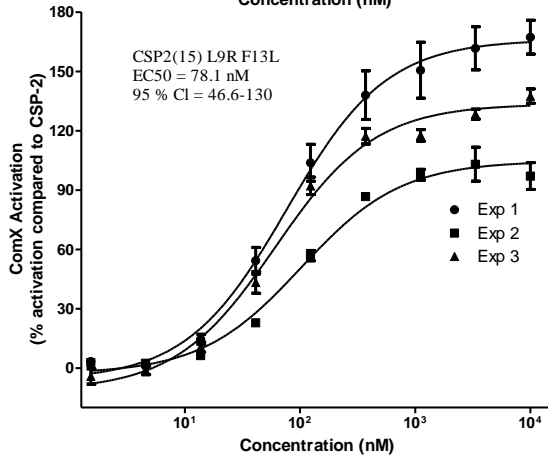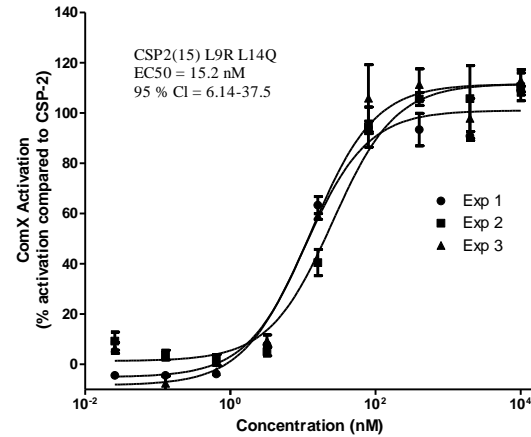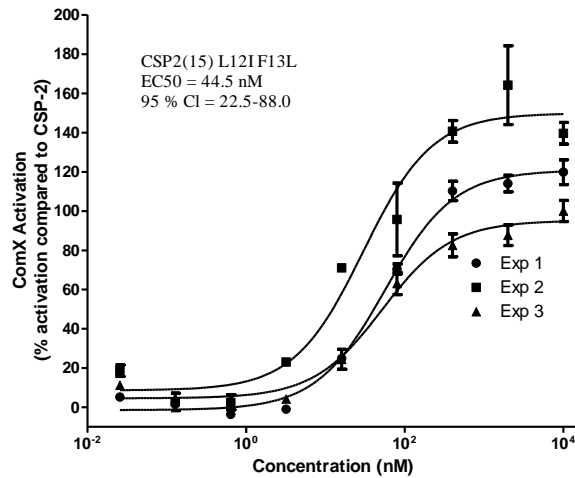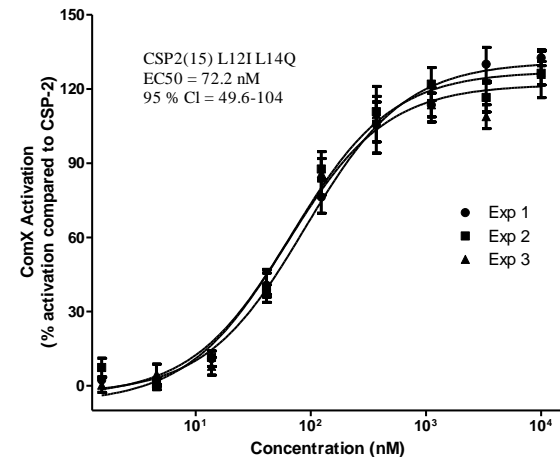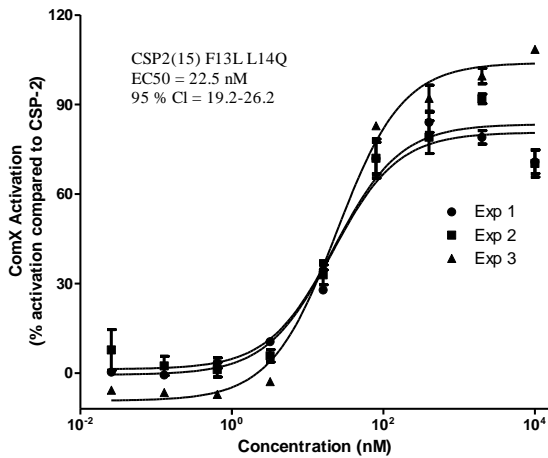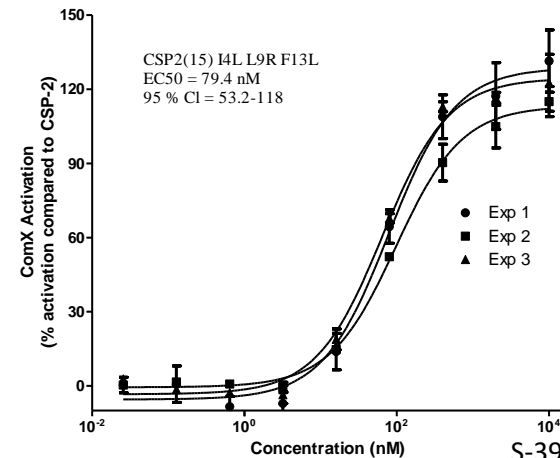

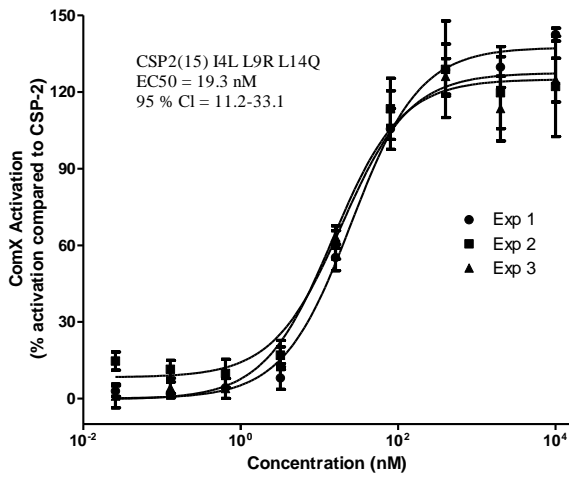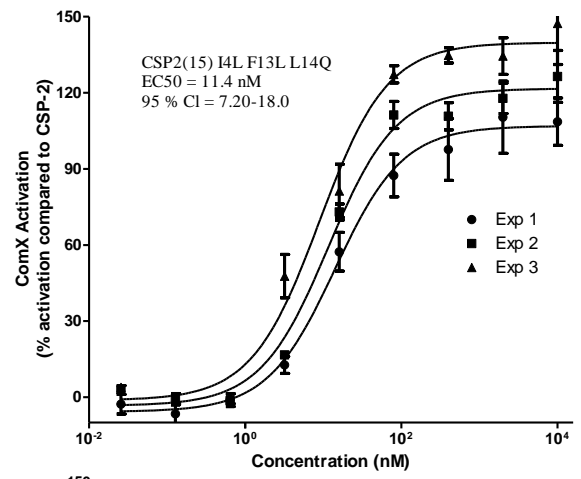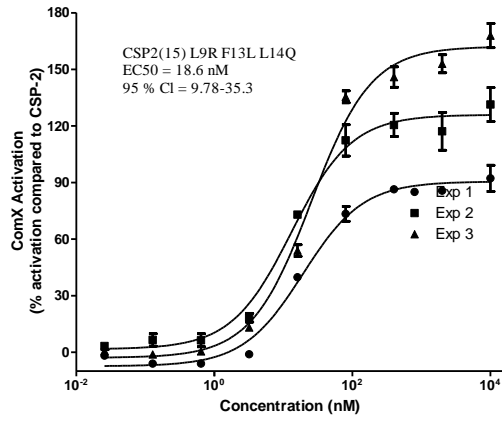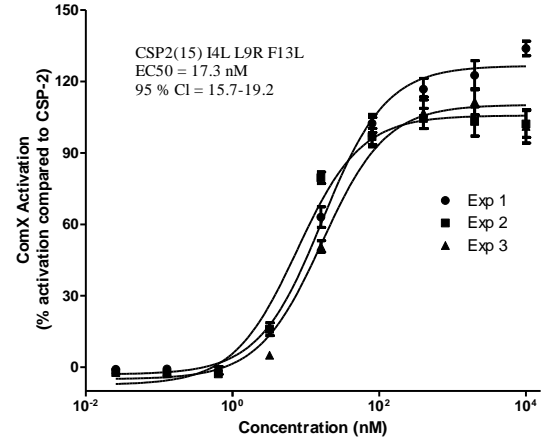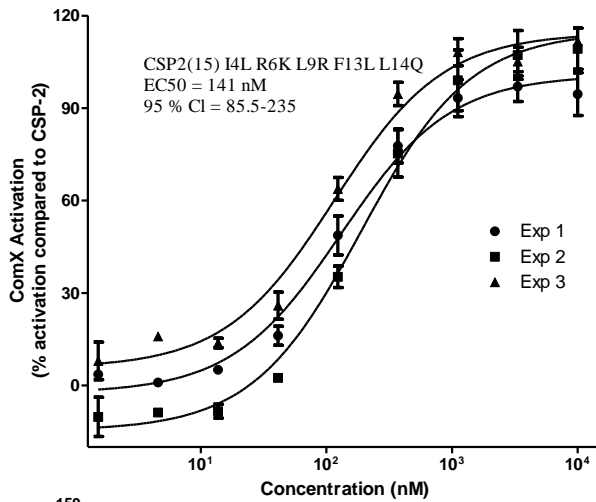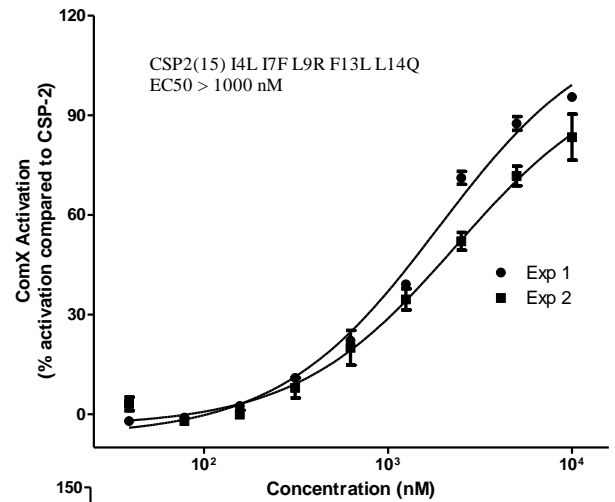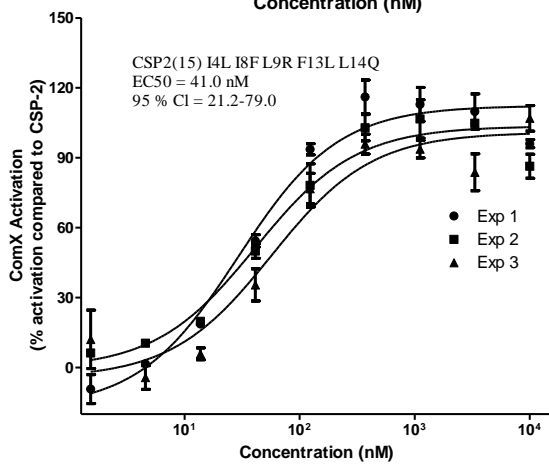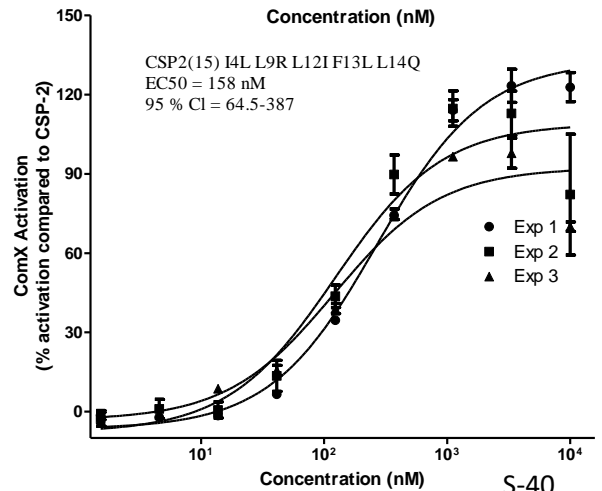



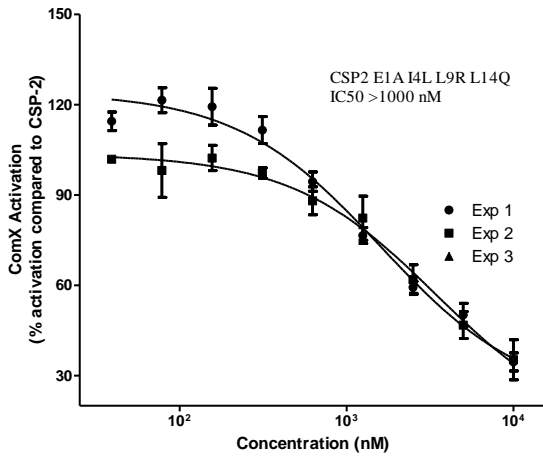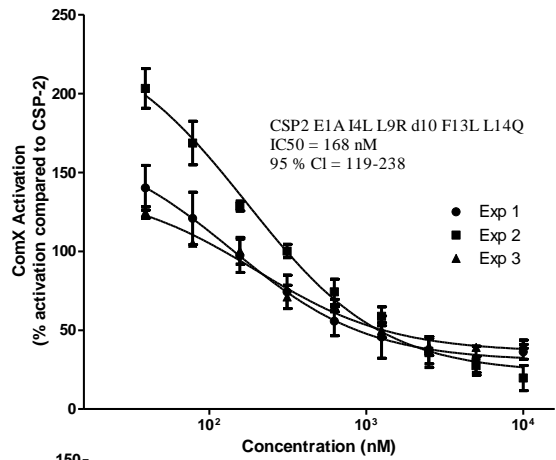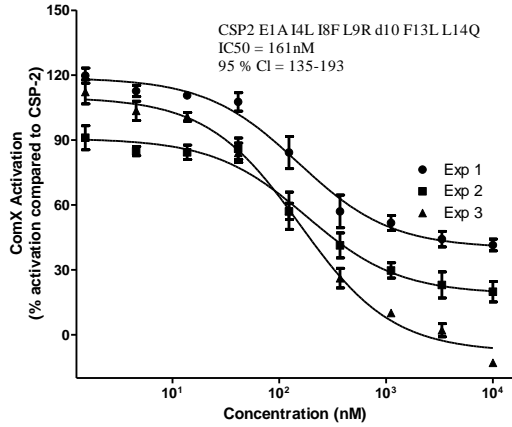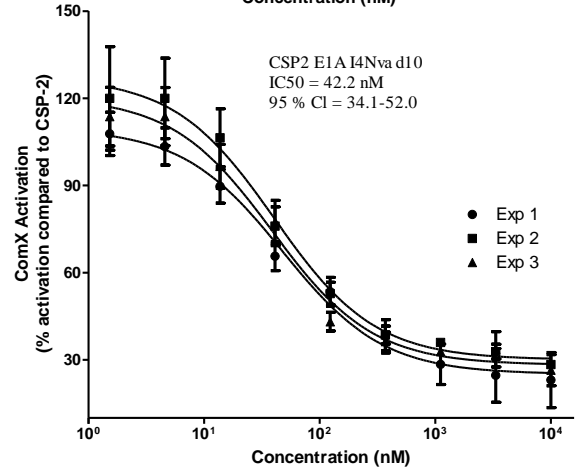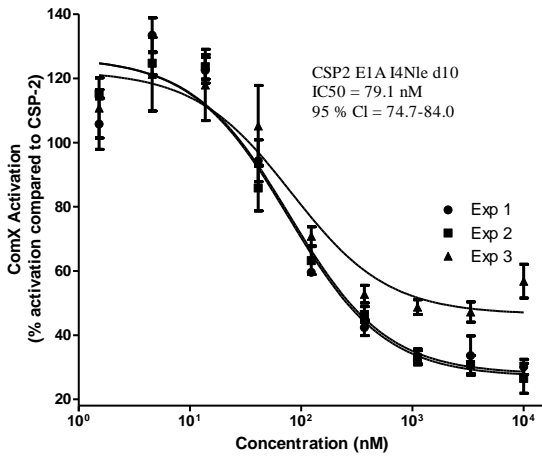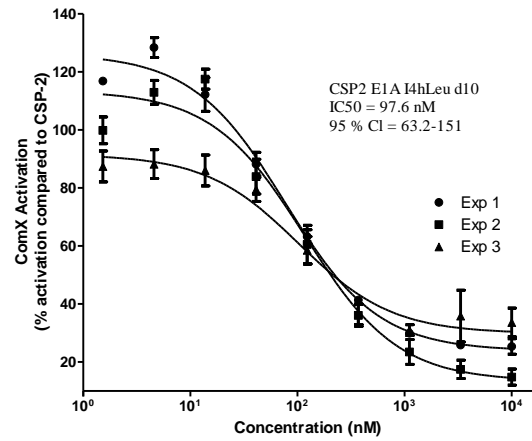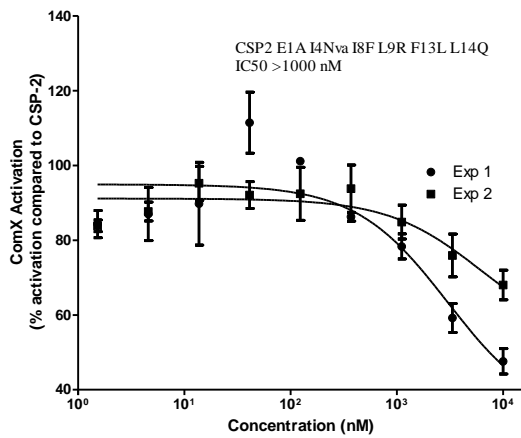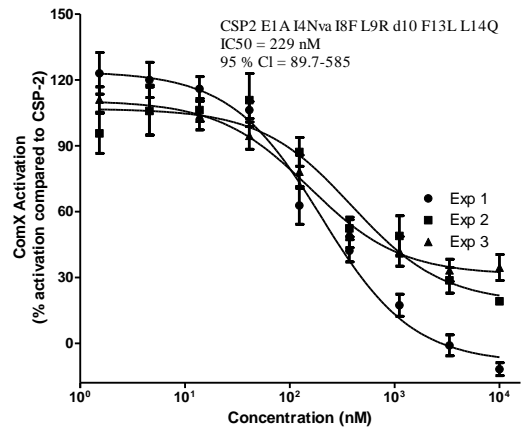

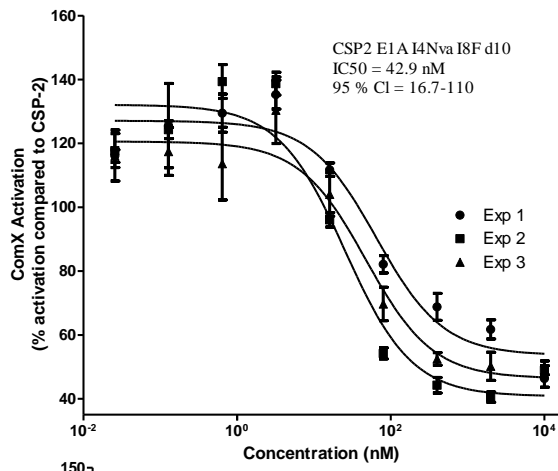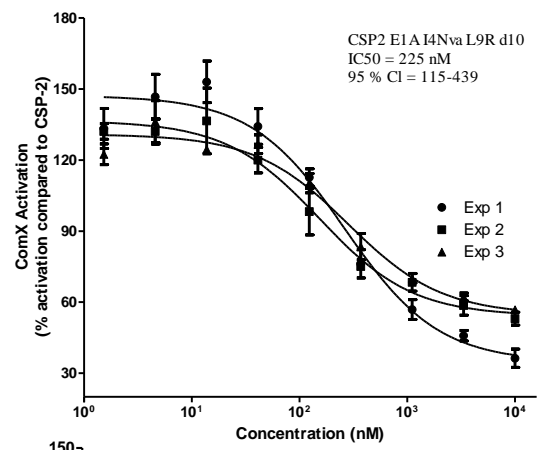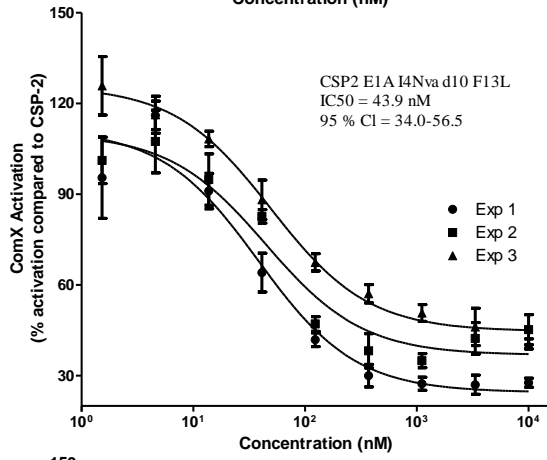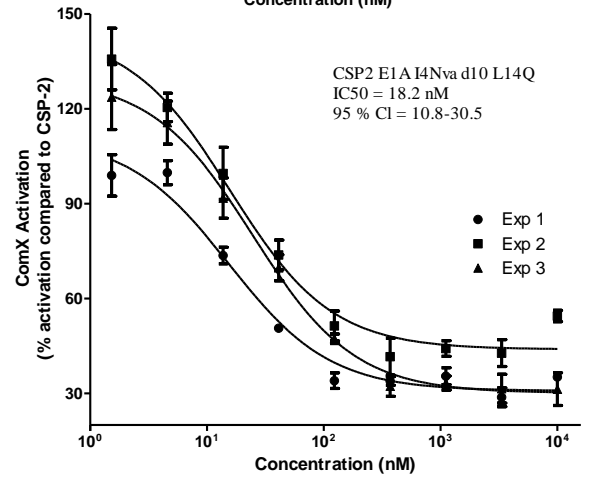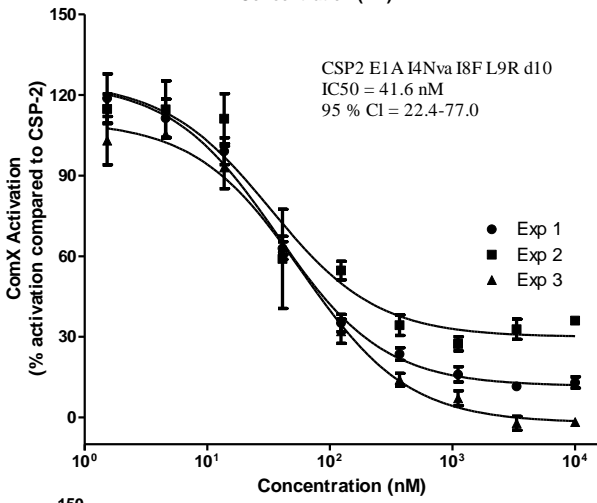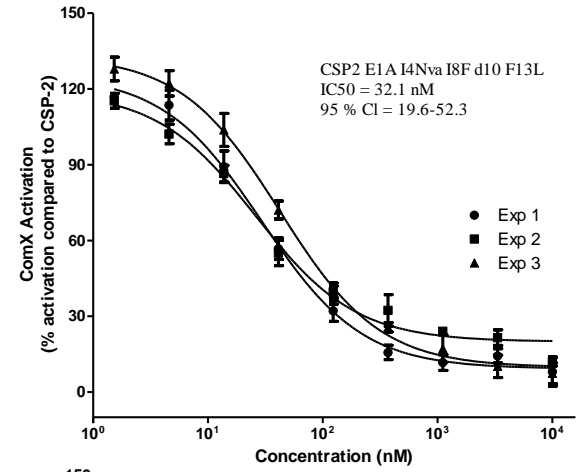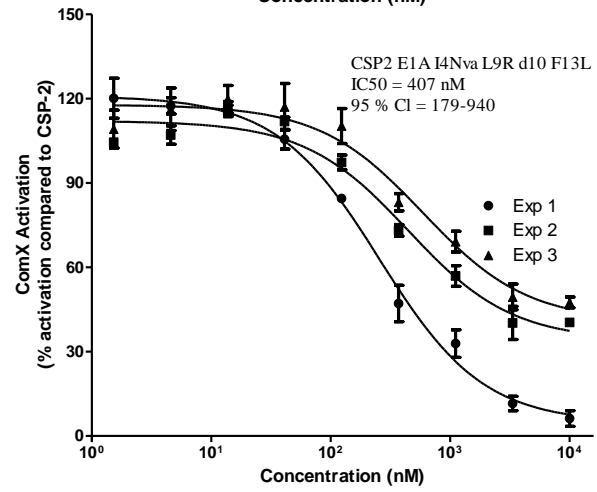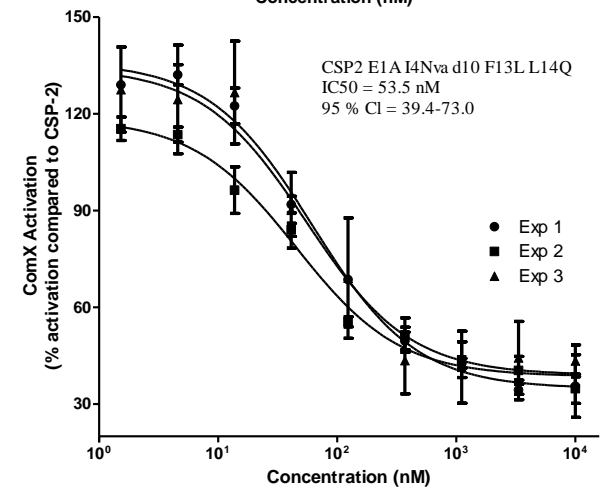

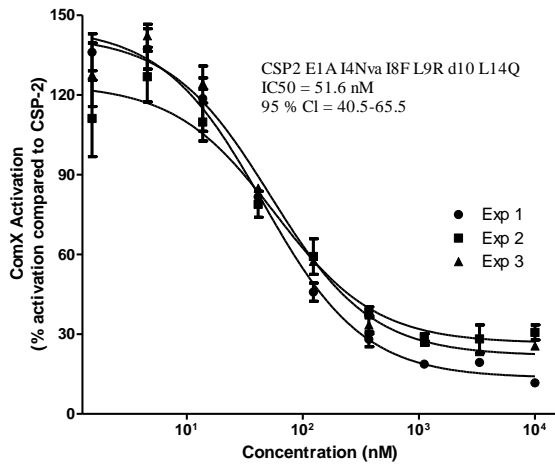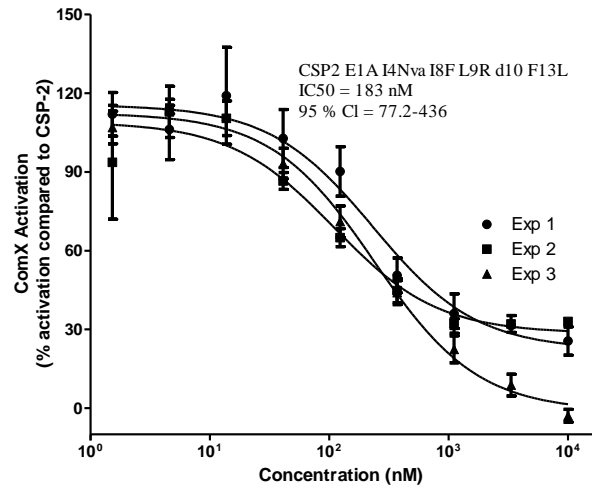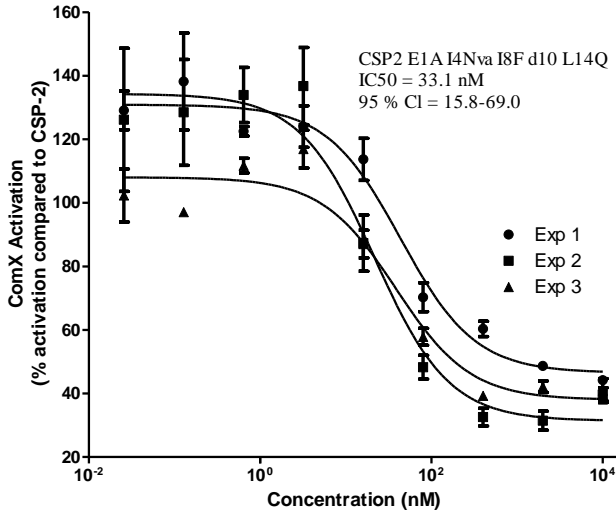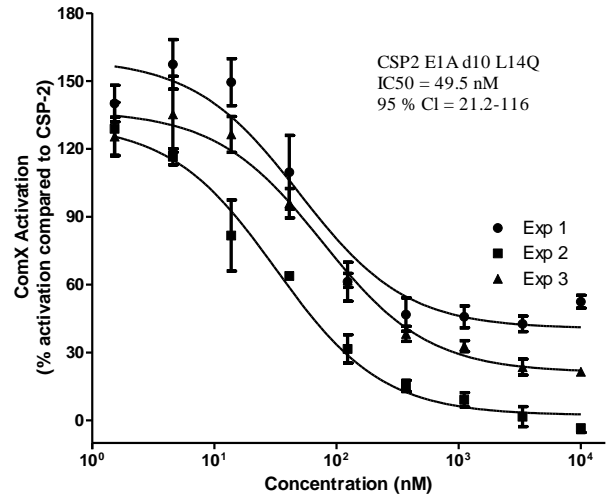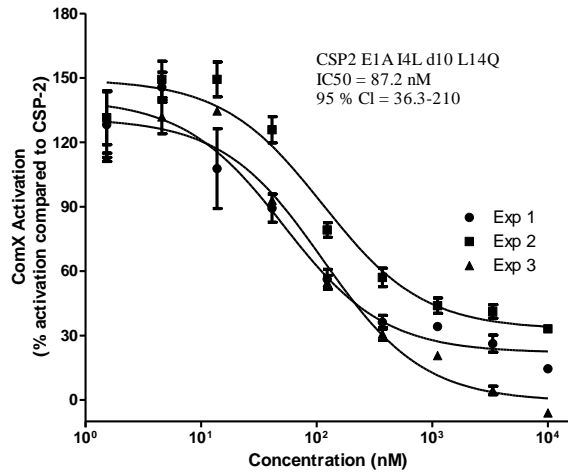

Supplement: NIHMS1042722-supplement-SI.pdf [file NIHMS1042722-supplement-SI.pdf]
